# Supplementary material for: Ambiphilic Frustrated Lewis Pair Exhibiting High Robustness and Reversible Water Activation: Towards the Metal-Free Hydrogenation of Carbon Dioxide
Source: PubMed Central journal article supplement (PMC6331835; doi:10.3390/molecules200711902), 2015-06-29
Supplement: molecules-20-11902-s001.pdf [file molecules-20-11902-s001.pdf]

# Supporting Information

## S1 NMR Spectra

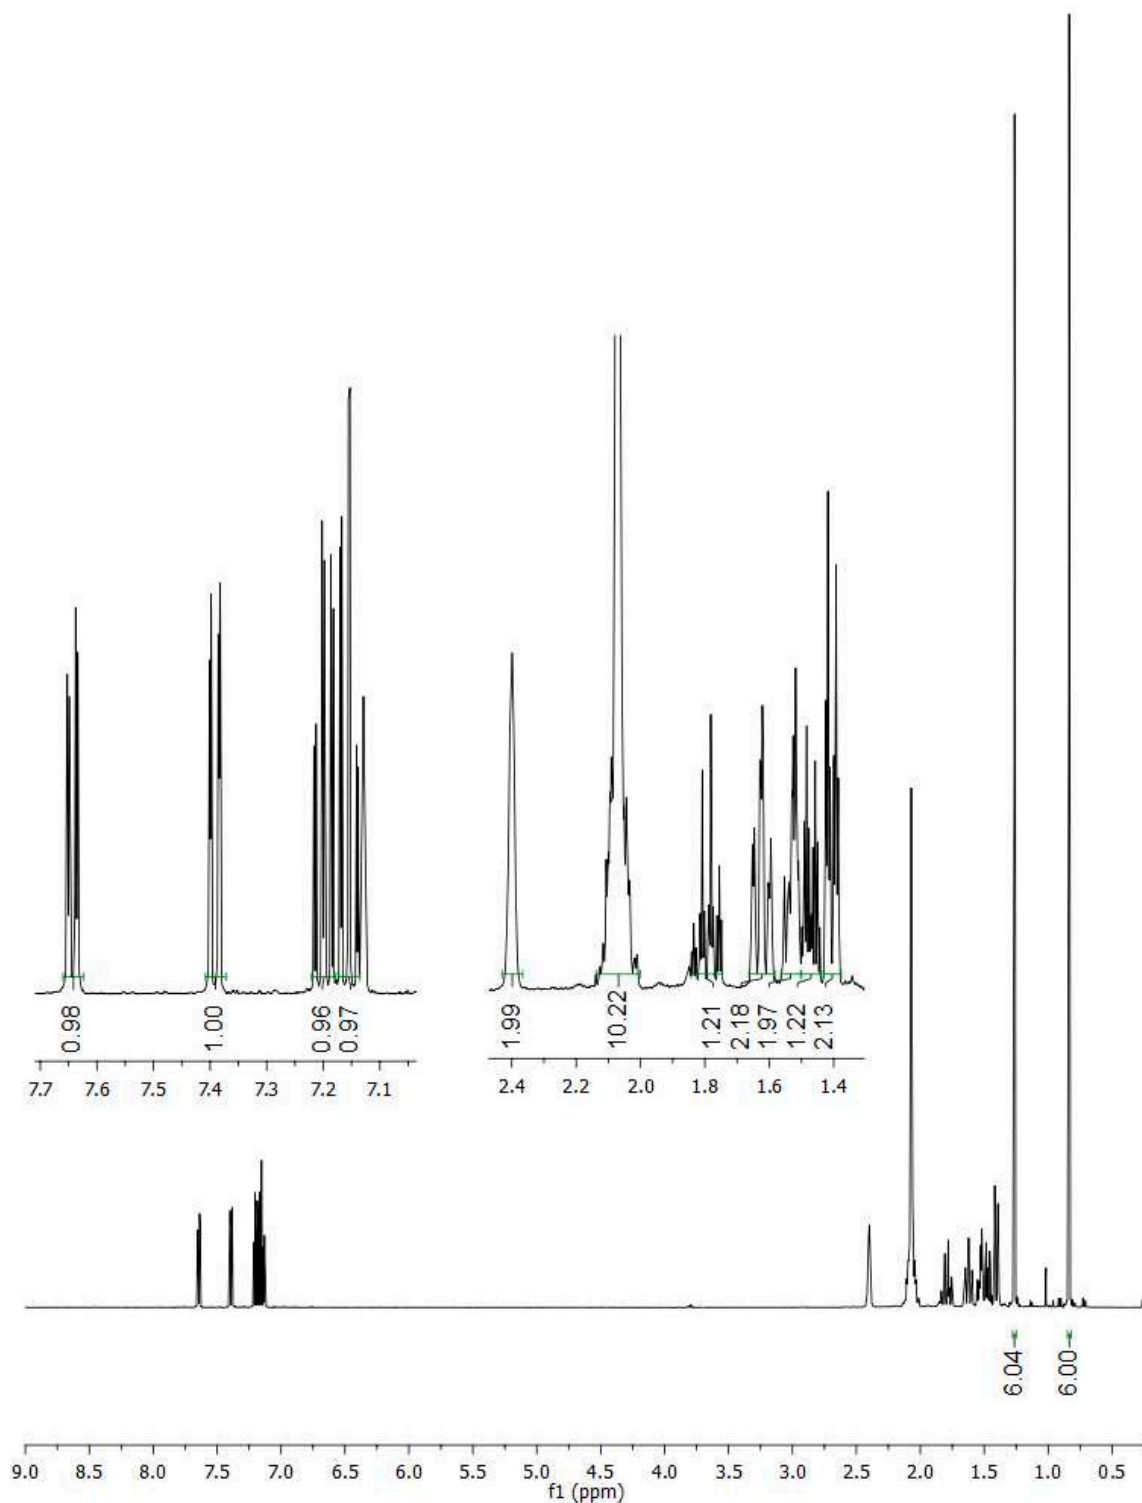

Figure S1.  $^1\text{H-NMR}$  spectrum (500 MHz, benzene- $d_6$ ) of **1**.

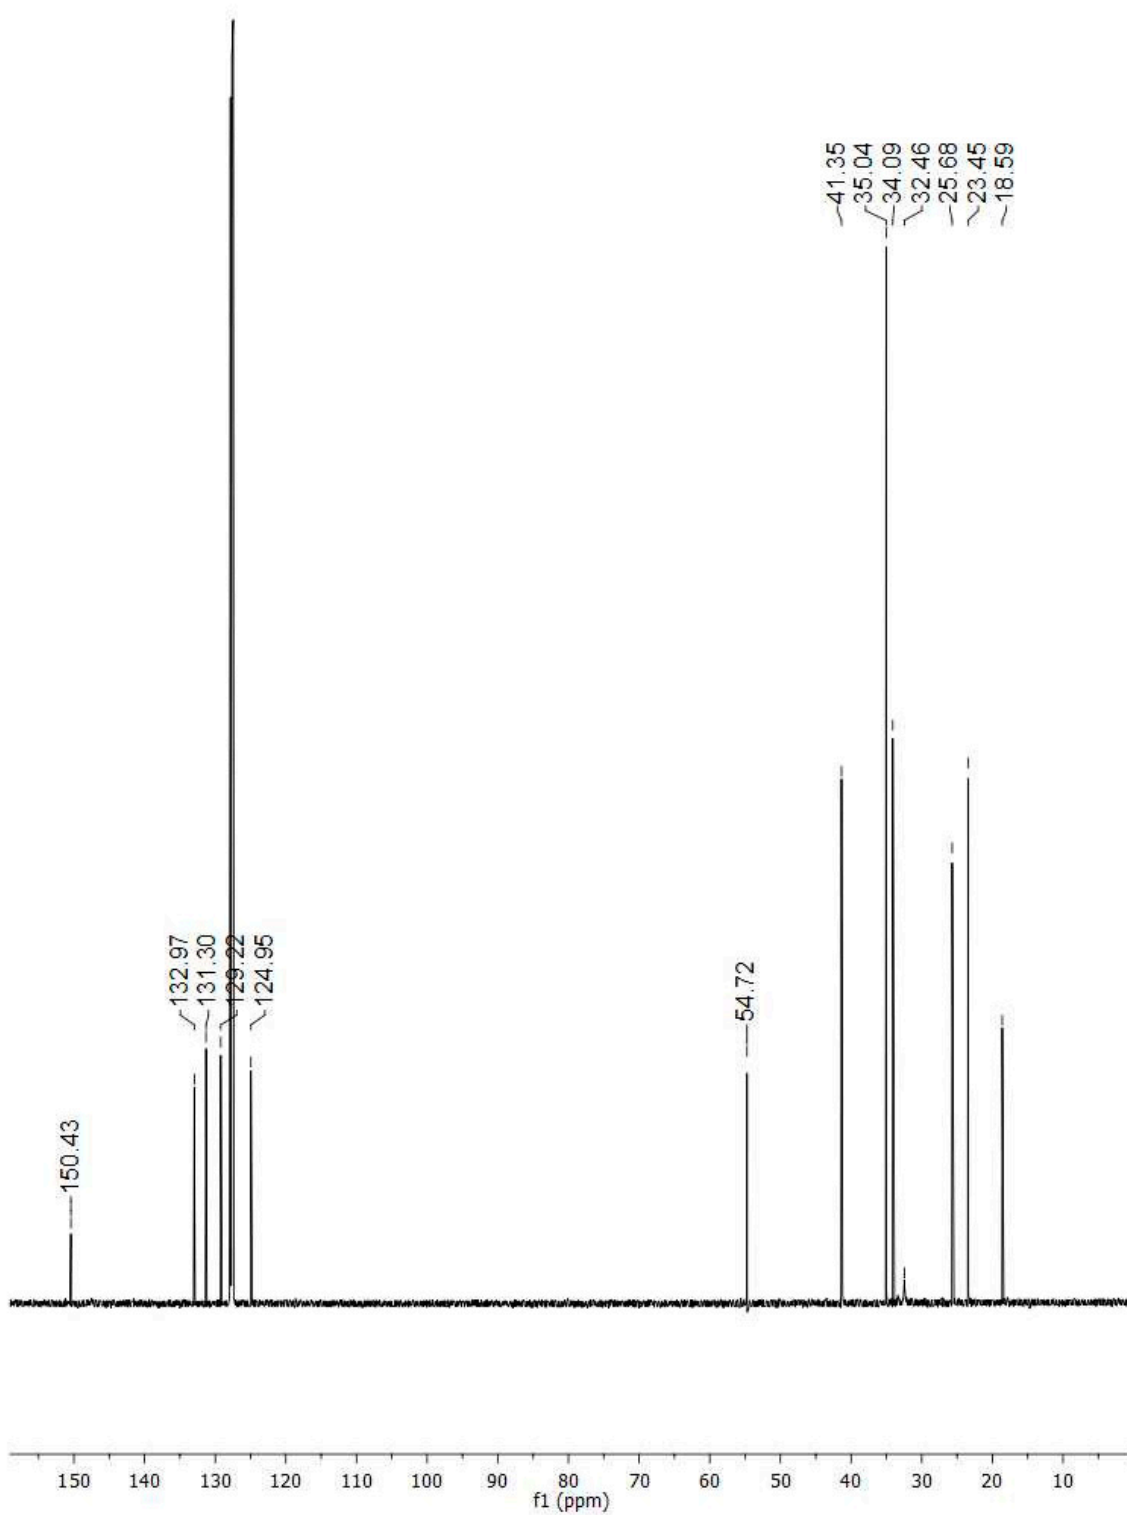

**Figure S2.**  $^{13}\text{C}$   $\{^1\text{H}\}$  NMR spectrum (126 MHz, benzene- $d_6$ ) of **1**.

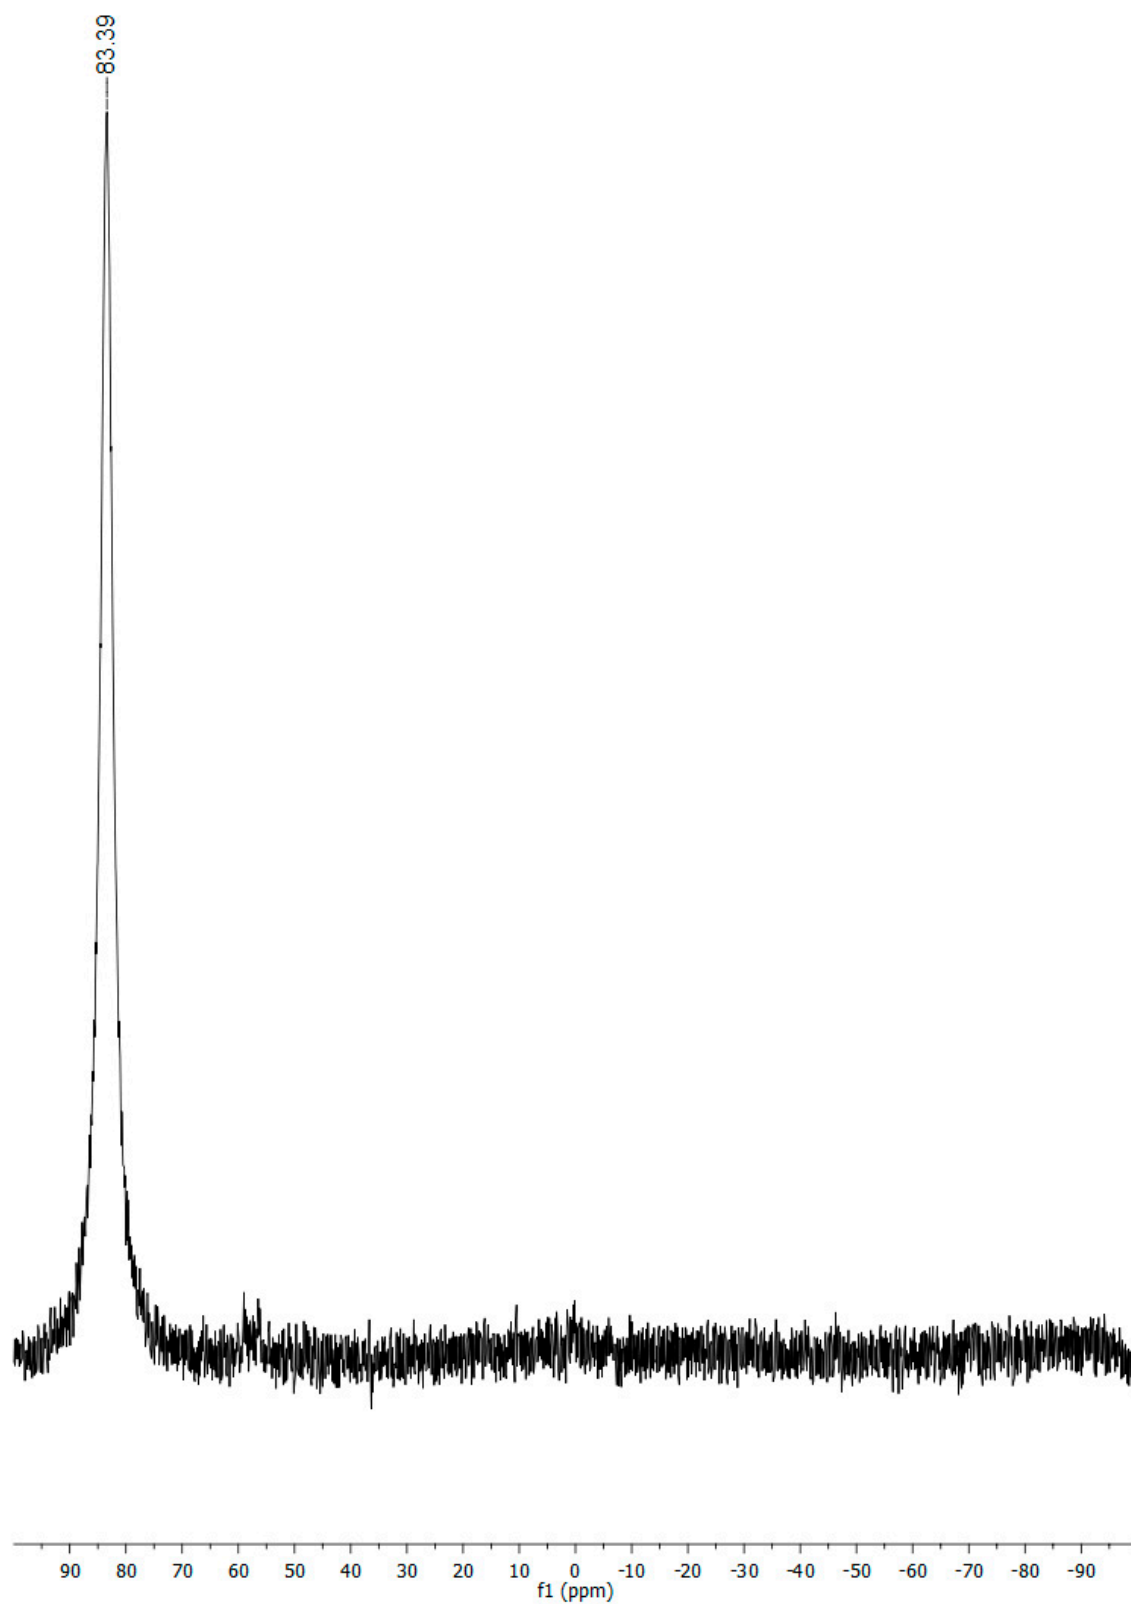

**Figure S3.**  $^{11}\text{B}\{^1\text{H}\}$  NMR spectrum (160 MHz, benzene- $d_6$ ) of **1**.

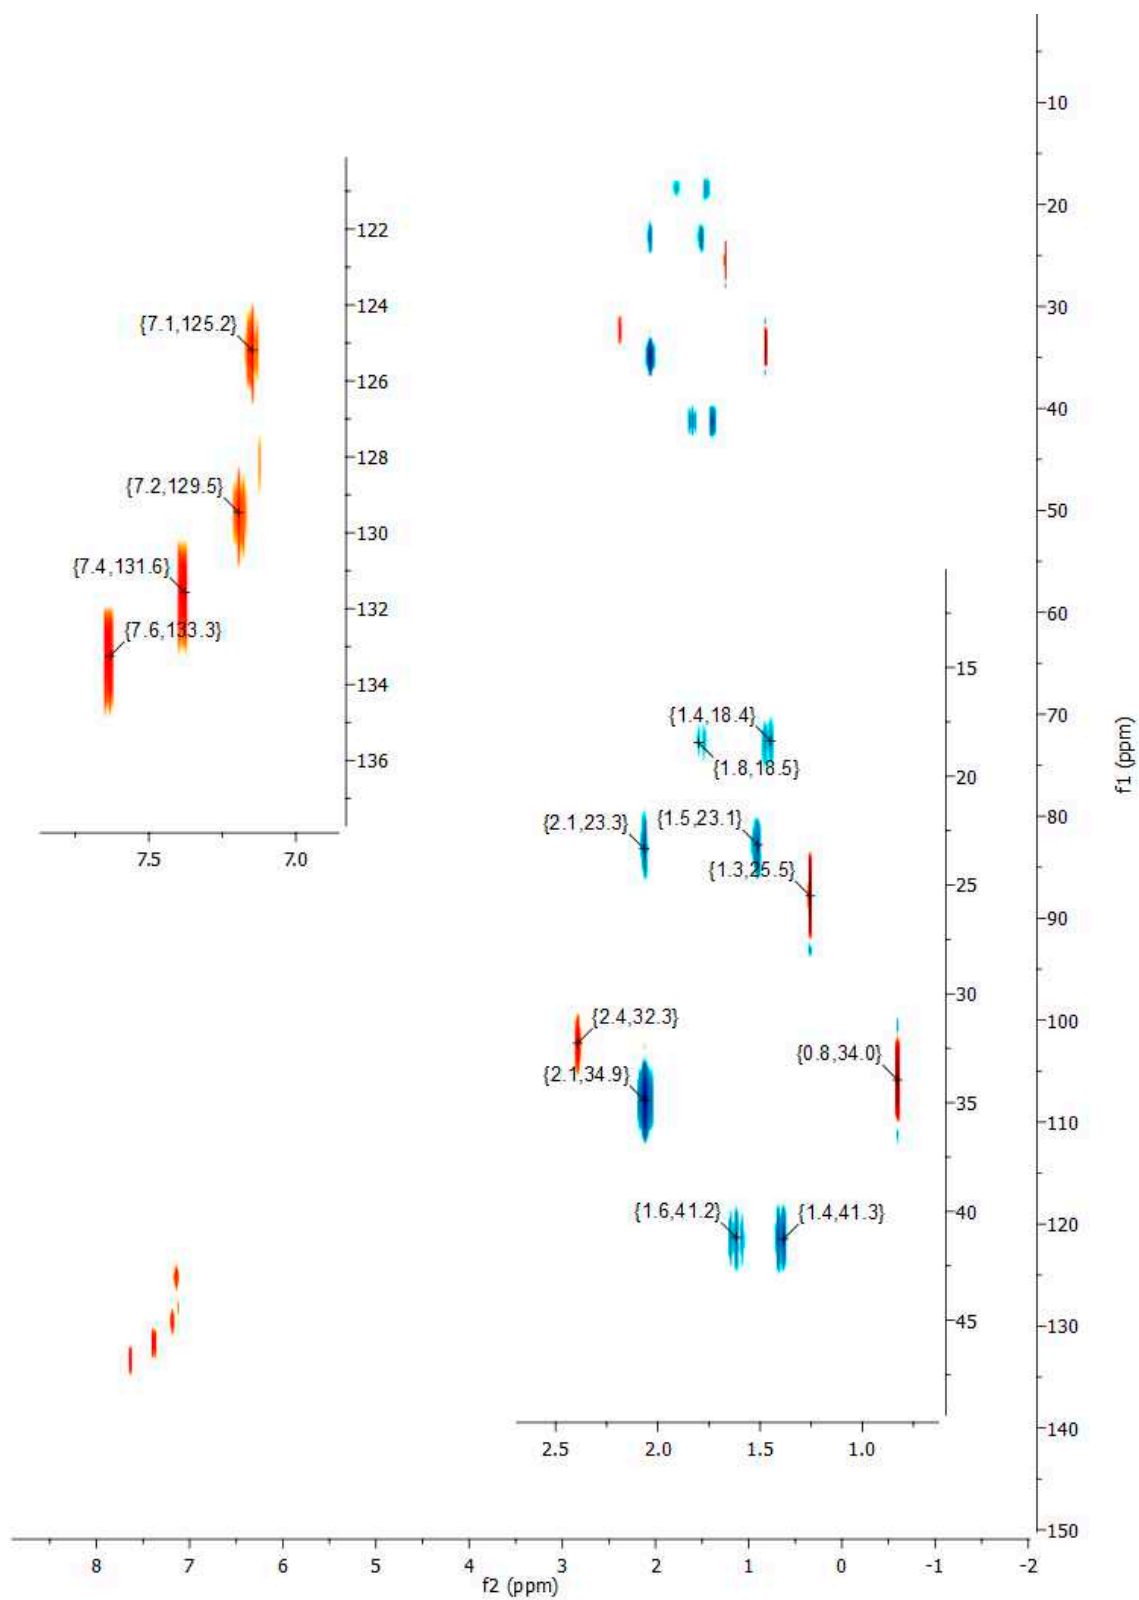

**Figure S4.**  $^{13}\text{C}$ - $^1\text{H}$  HSQC NMR spectrum (126 MHz–500 MHz, benzene- $d_6$ ) of **1**.

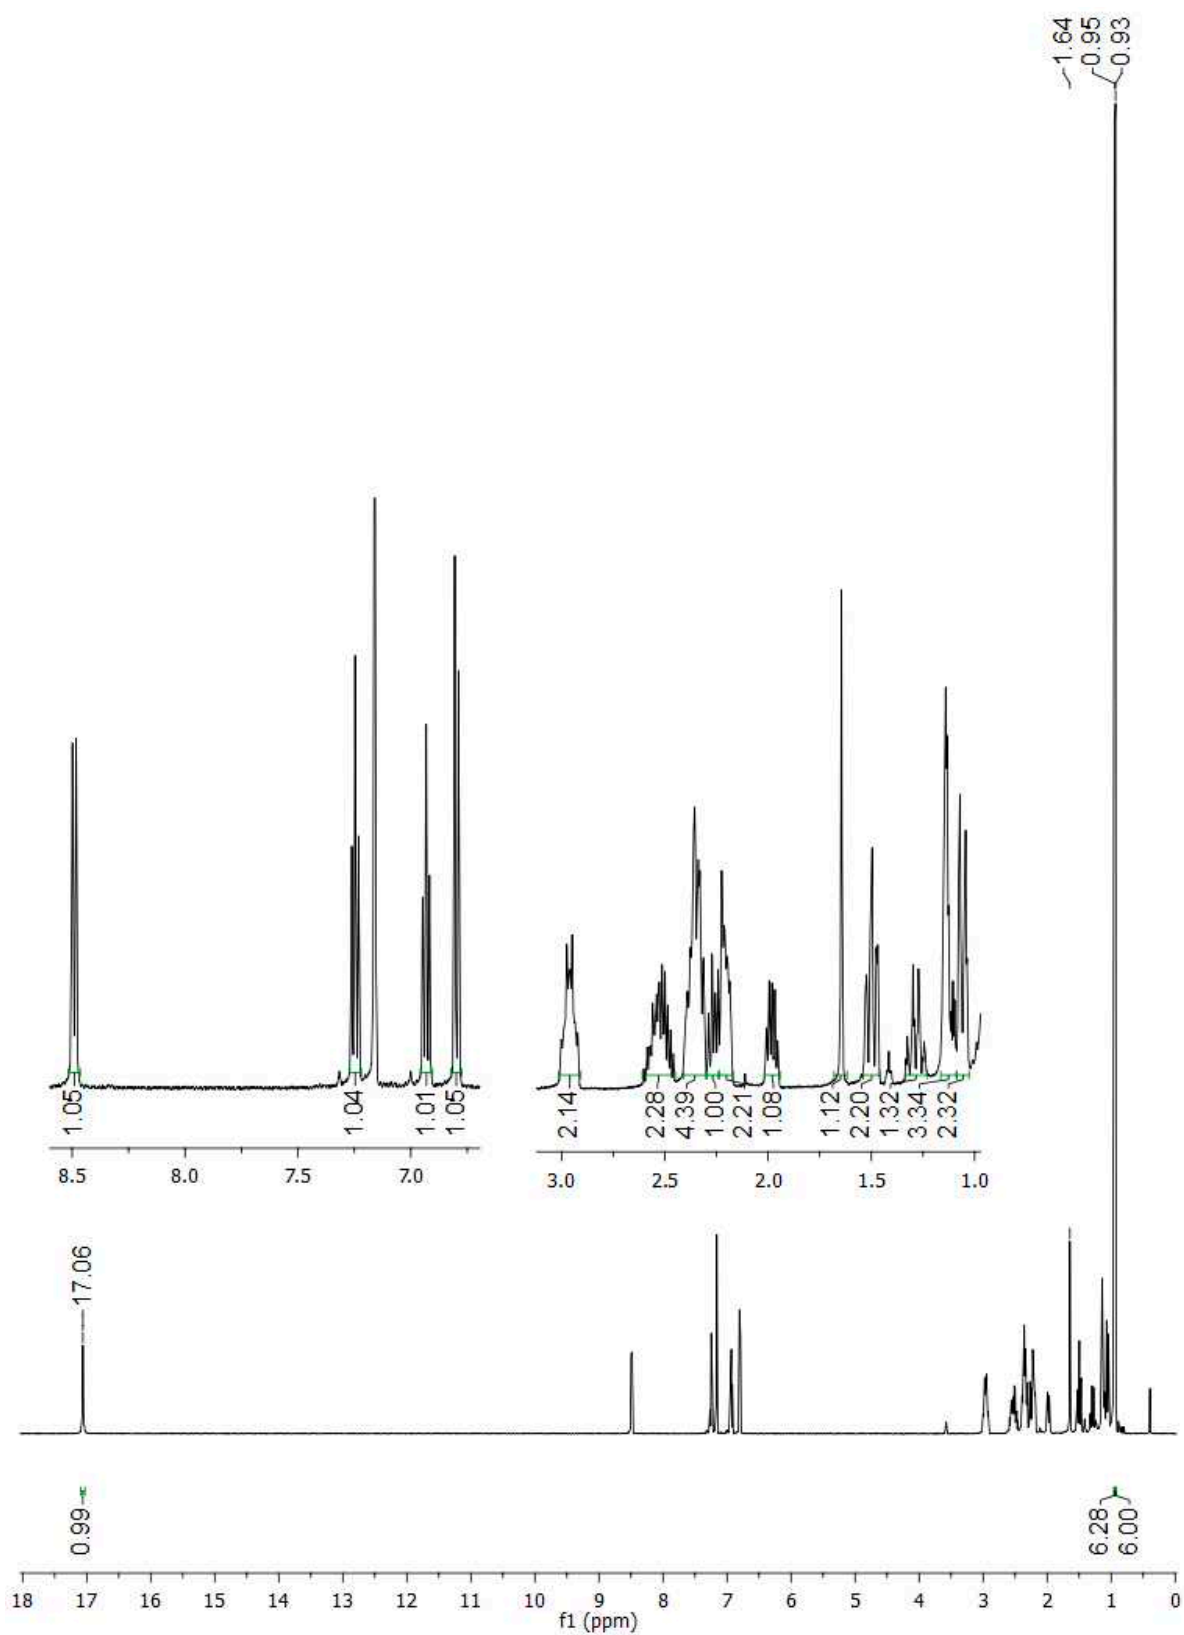

Figure S5.  $^1\text{H-NMR}$  spectrum (500 MHz, benzene- $d_6$ ) of **2**.

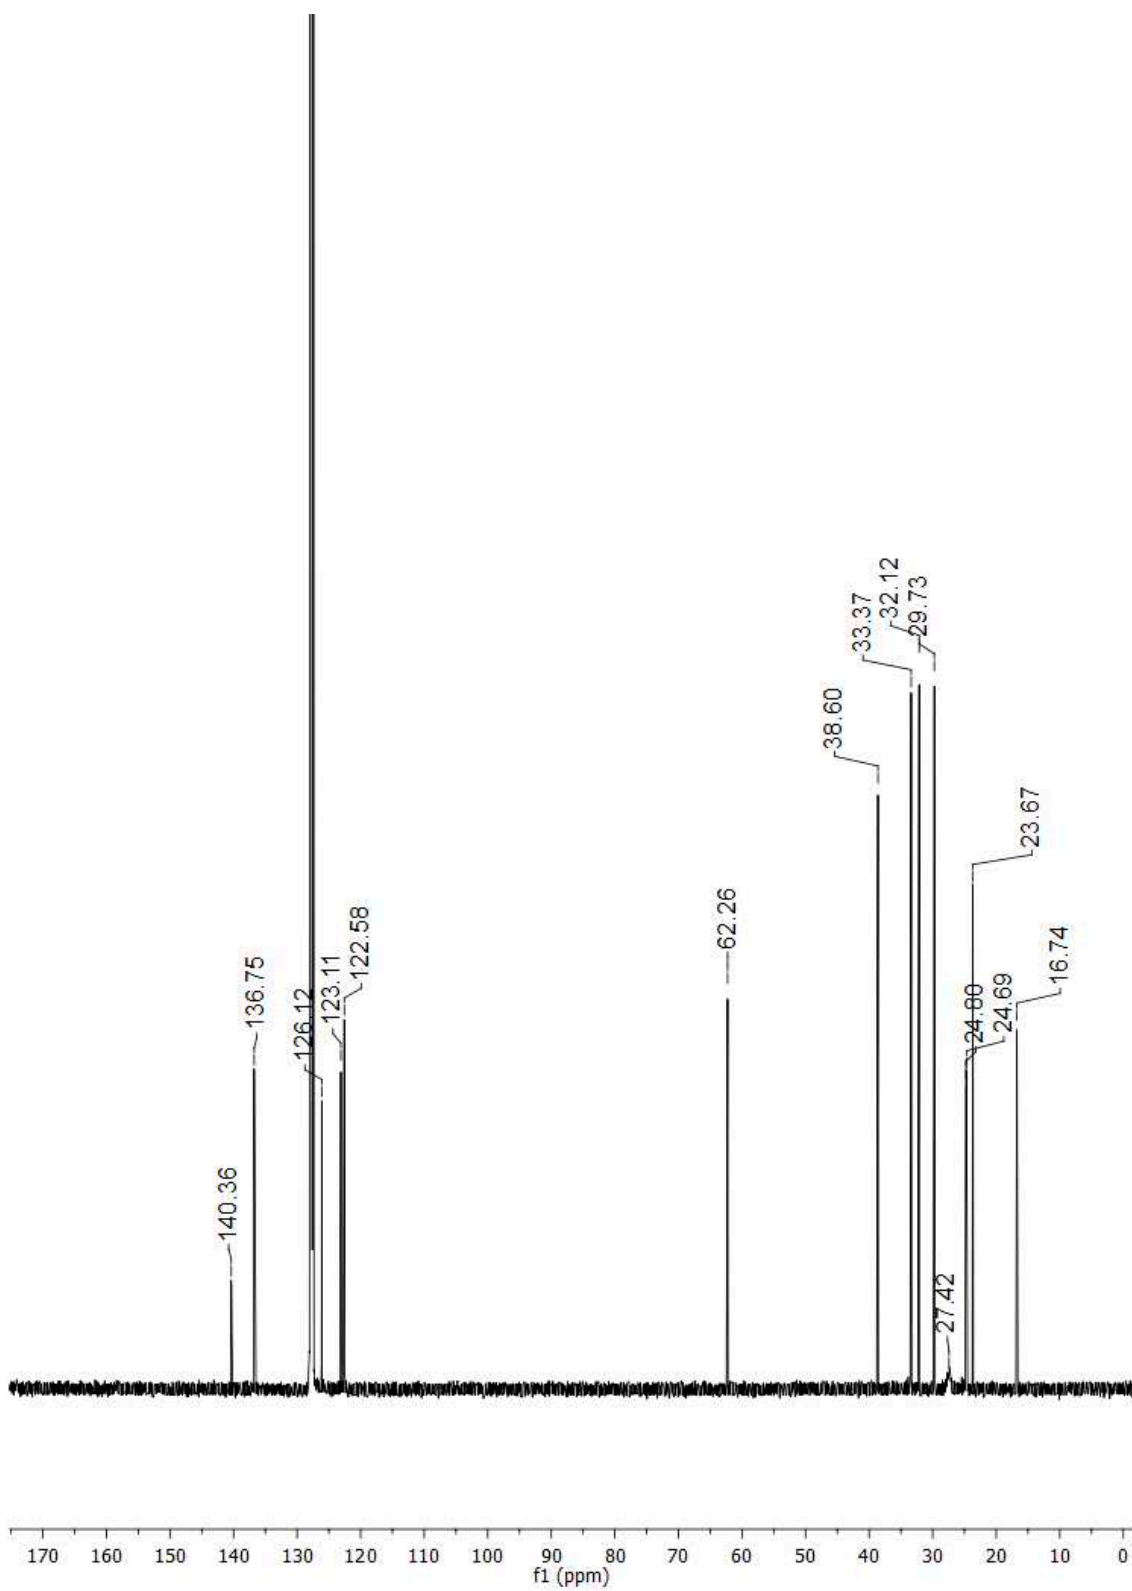

**Figure S6.**  $^{13}\text{C}\{^1\text{H}\}$  NMR spectrum (126 MHz, chloroform-*d*) of 2.

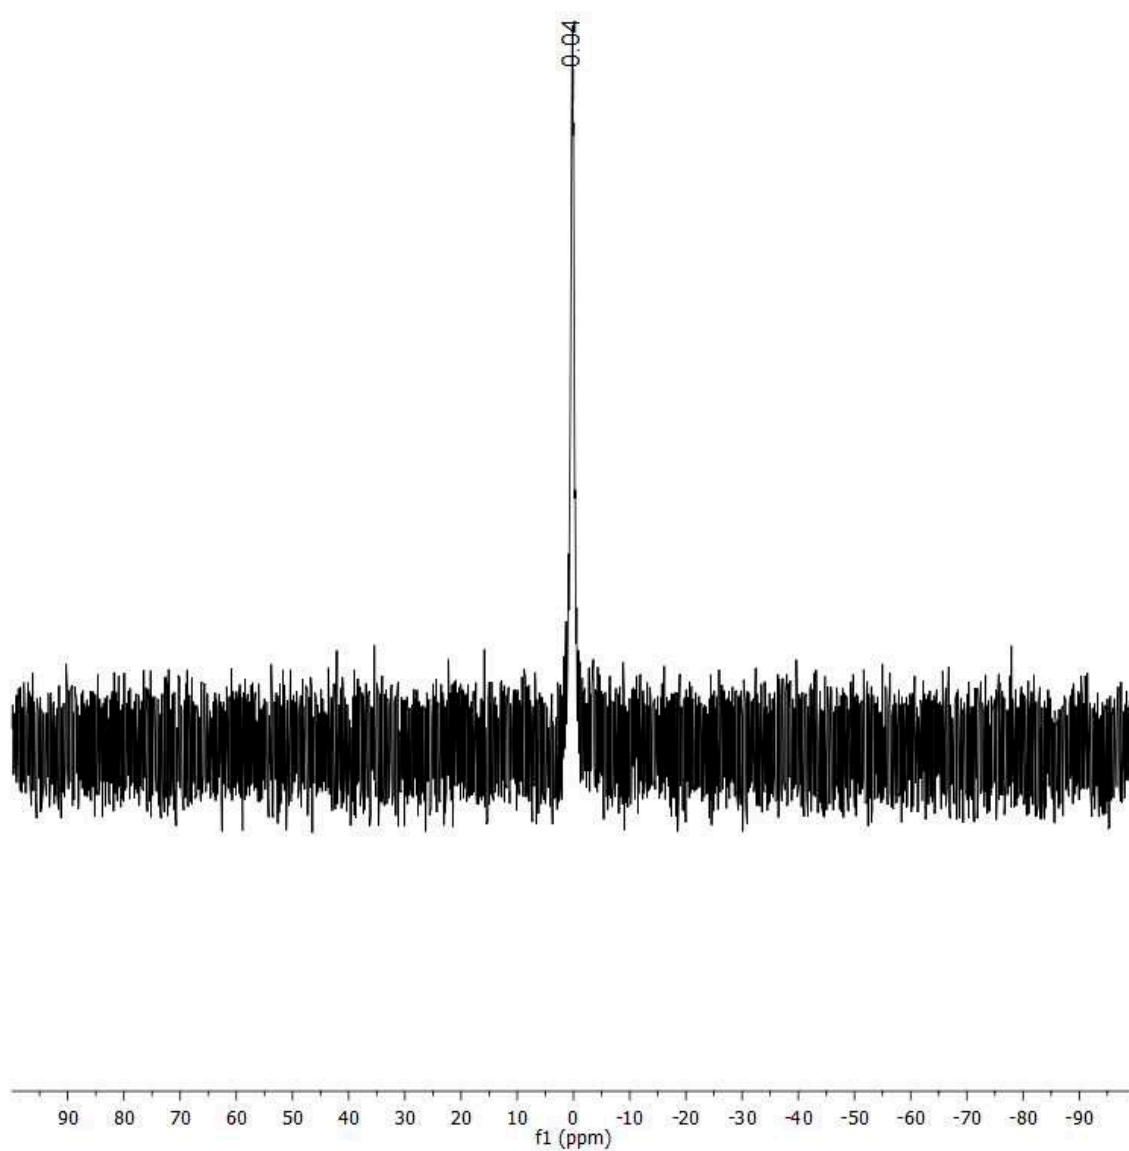

**Figure S7.**  $^{11}\text{B}\{^1\text{H}\}$  NMR spectrum (160 MHz, benzene- $d_6$ ) of **2**.

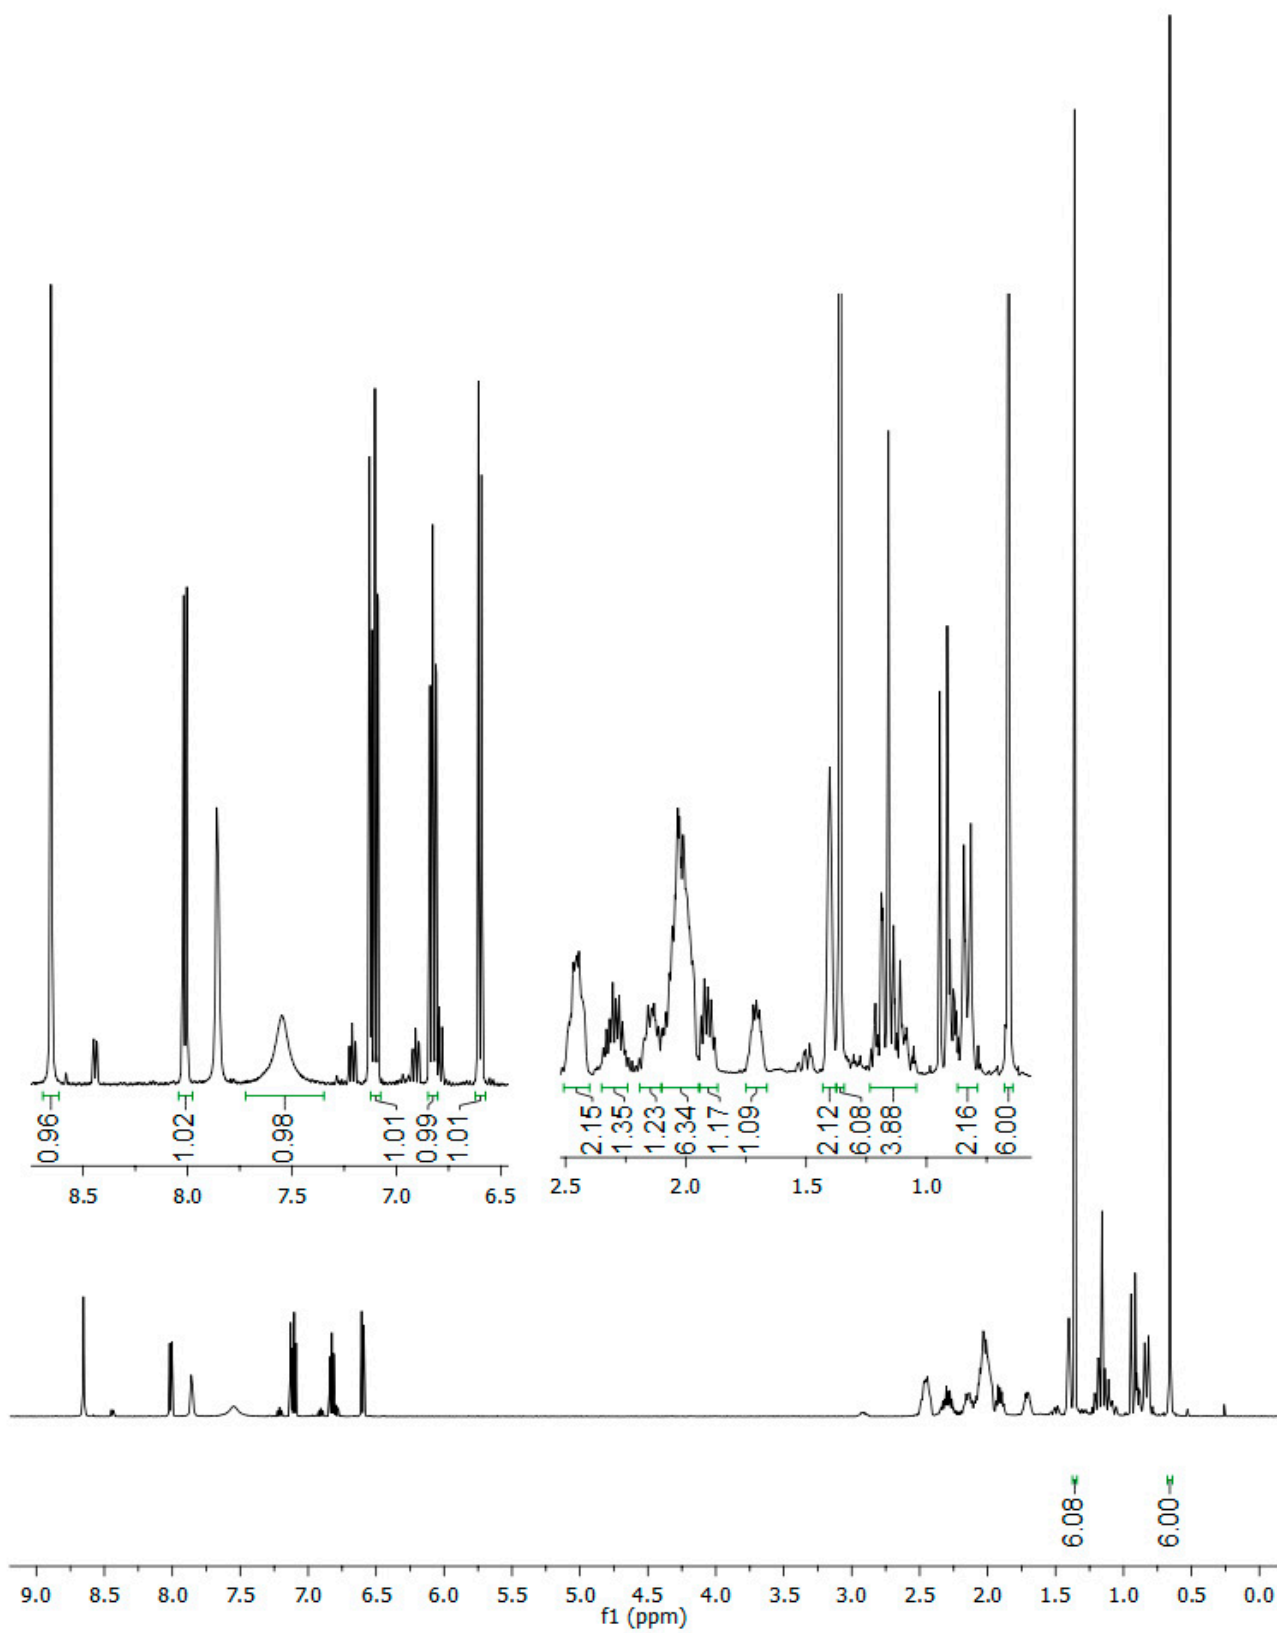

**Figure S8.**  $^1\text{H}$  NMR spectrum (500 MHz, benzene- $d_6$ ) of **3**.



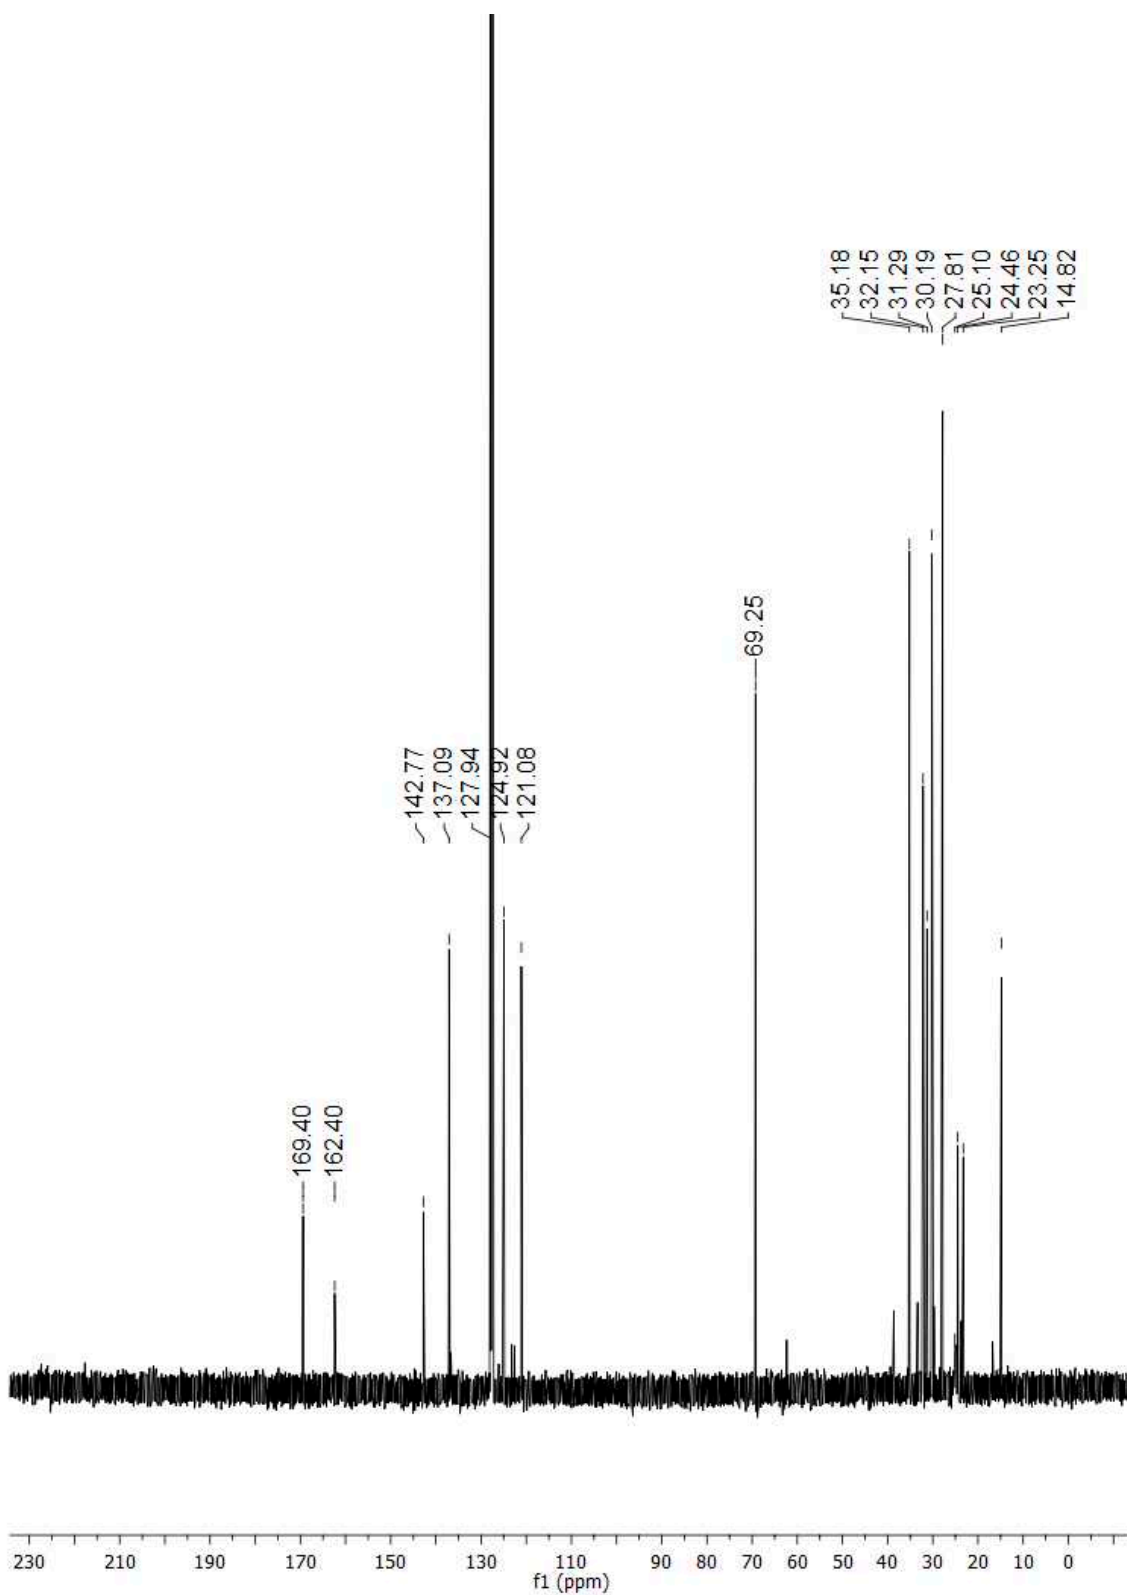

**Figure S9.**  $^{13}\text{C}$   $\{^1\text{H}\}$  NMR spectrum (126 MHz, benzene- $d_6$ ) of **3**.

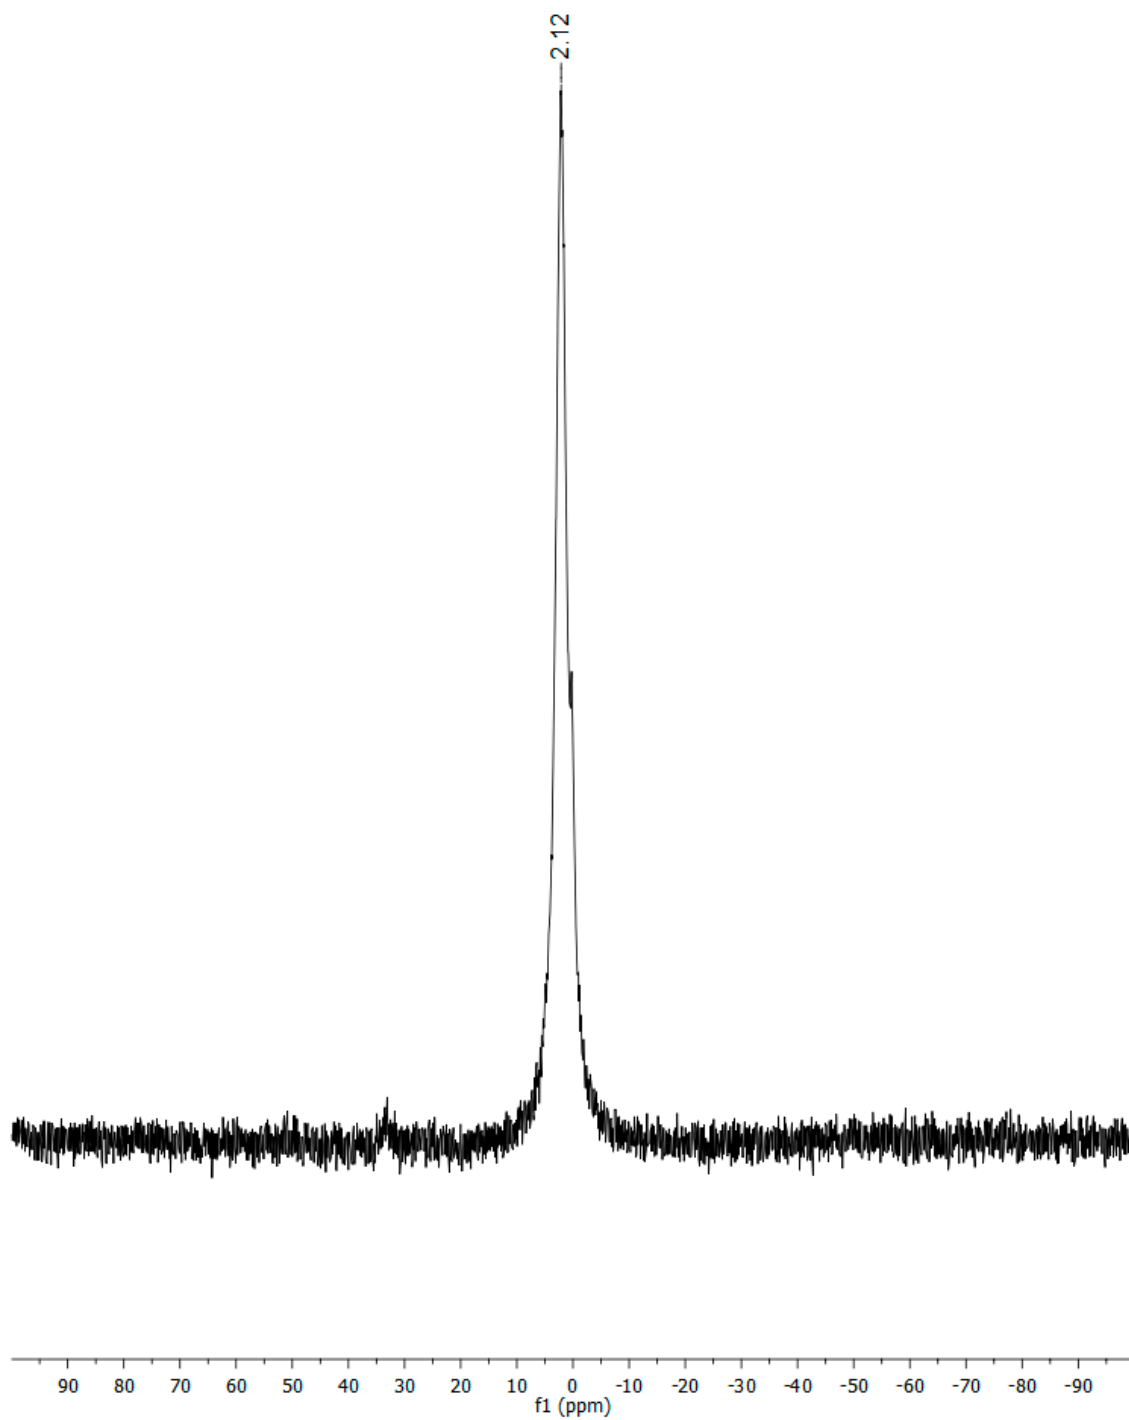

**Figure S10.**  $^{11}\text{B}\{^1\text{H}\}$  NMR spectrum (160 MHz, benzene- $d_6$ ) of **3**.

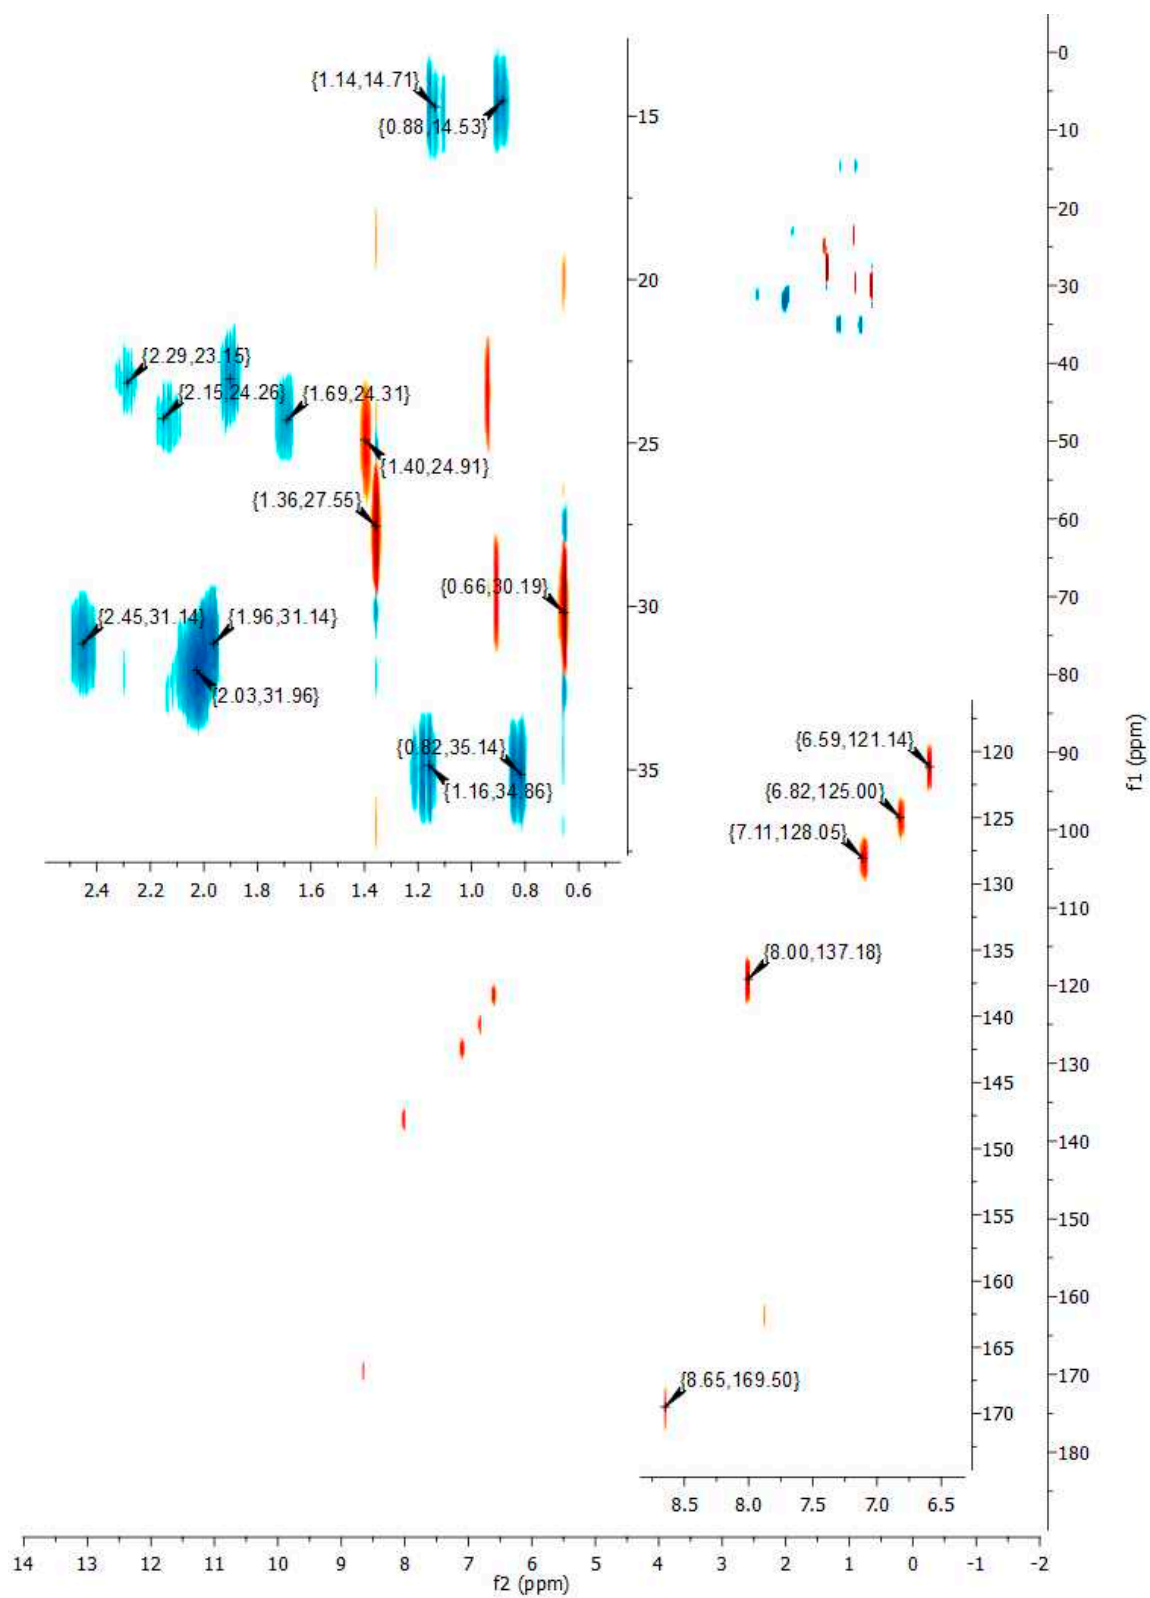

**Figure S11.**  $^{13}\text{C}$ - $^1\text{H}$  HSQC NMR (126 MHz–500 MHz, benzene- $d_6$ ) spectra of **3**.

Room Temperature

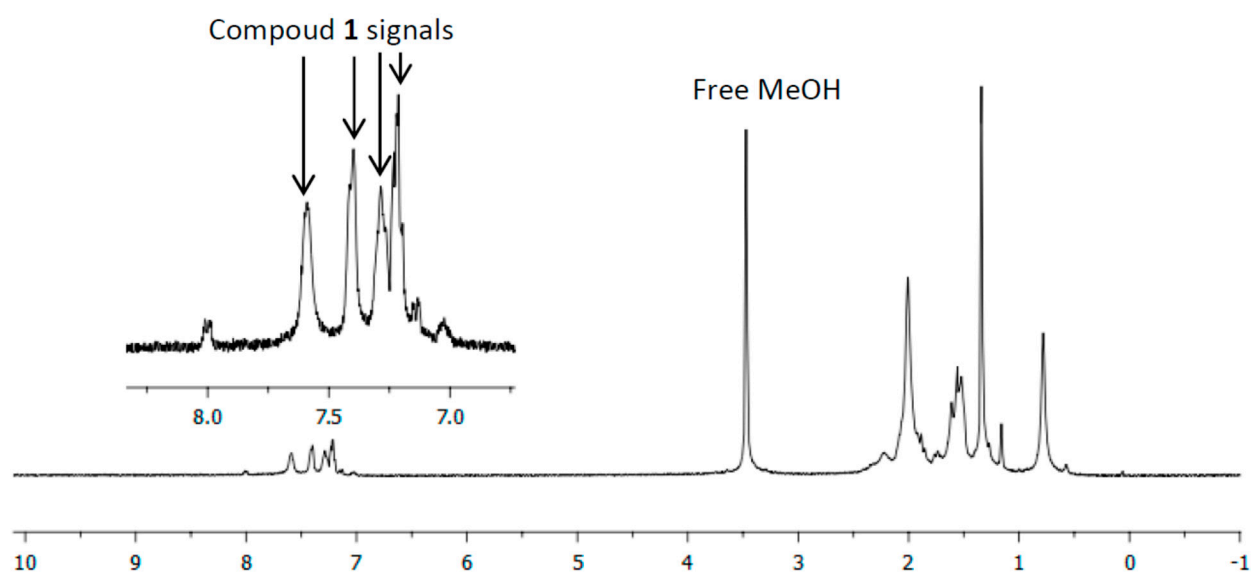

-20 °C

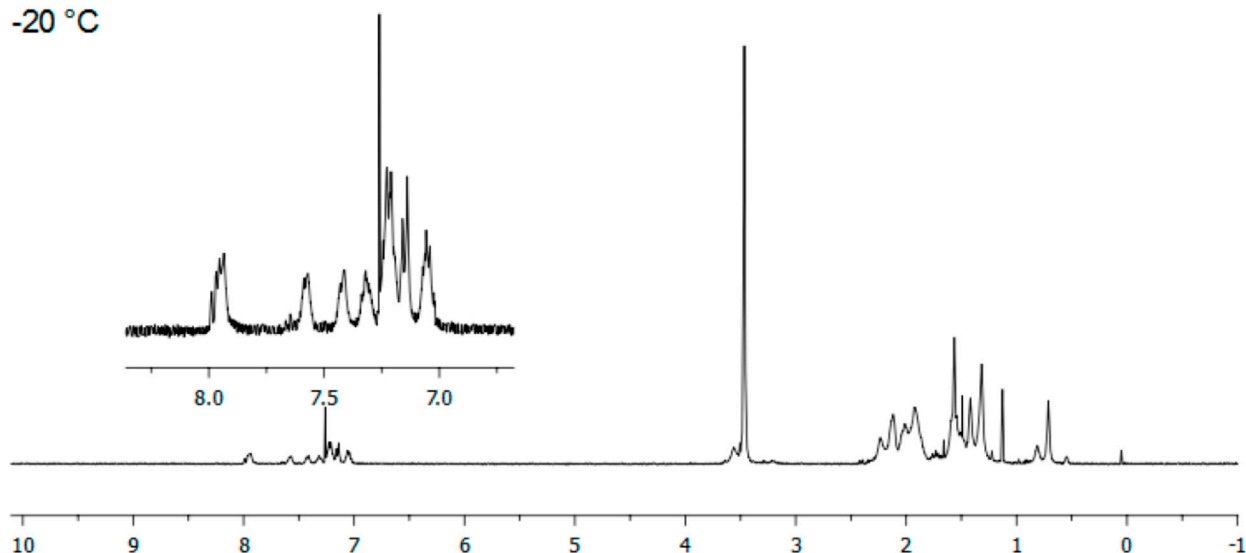

-40 °C

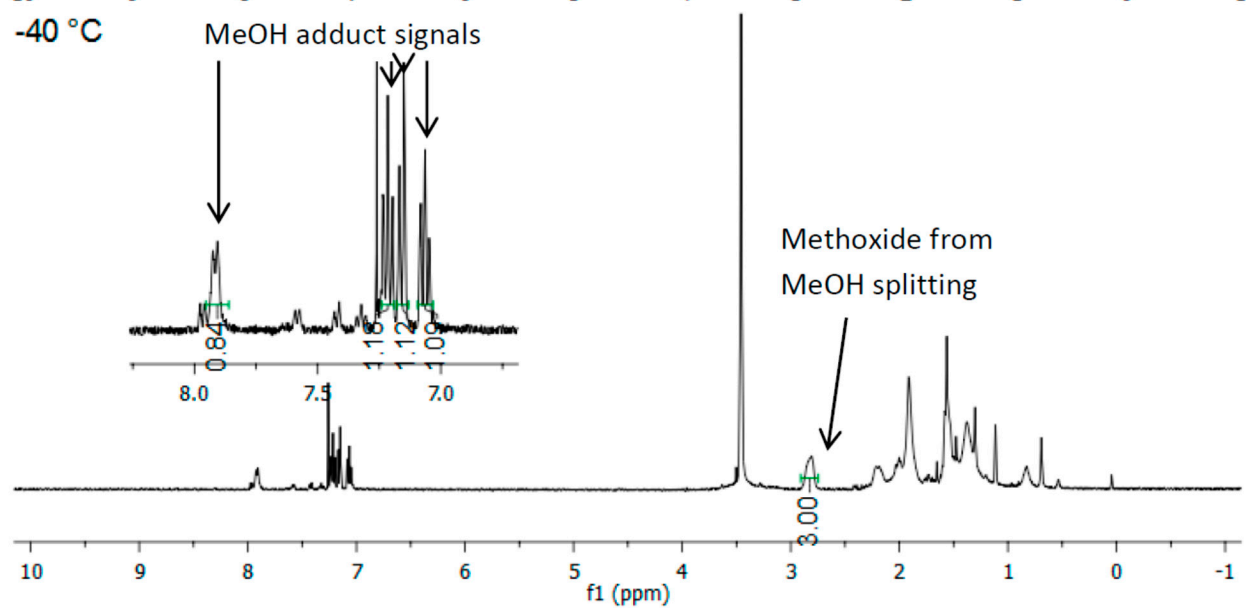

Figure S12. VT  $^1\text{H-NMR}$  (400 MHz,  $\text{CDCl}_3$ ) spectrum of **1** with *ca* 5eq of MeOH.

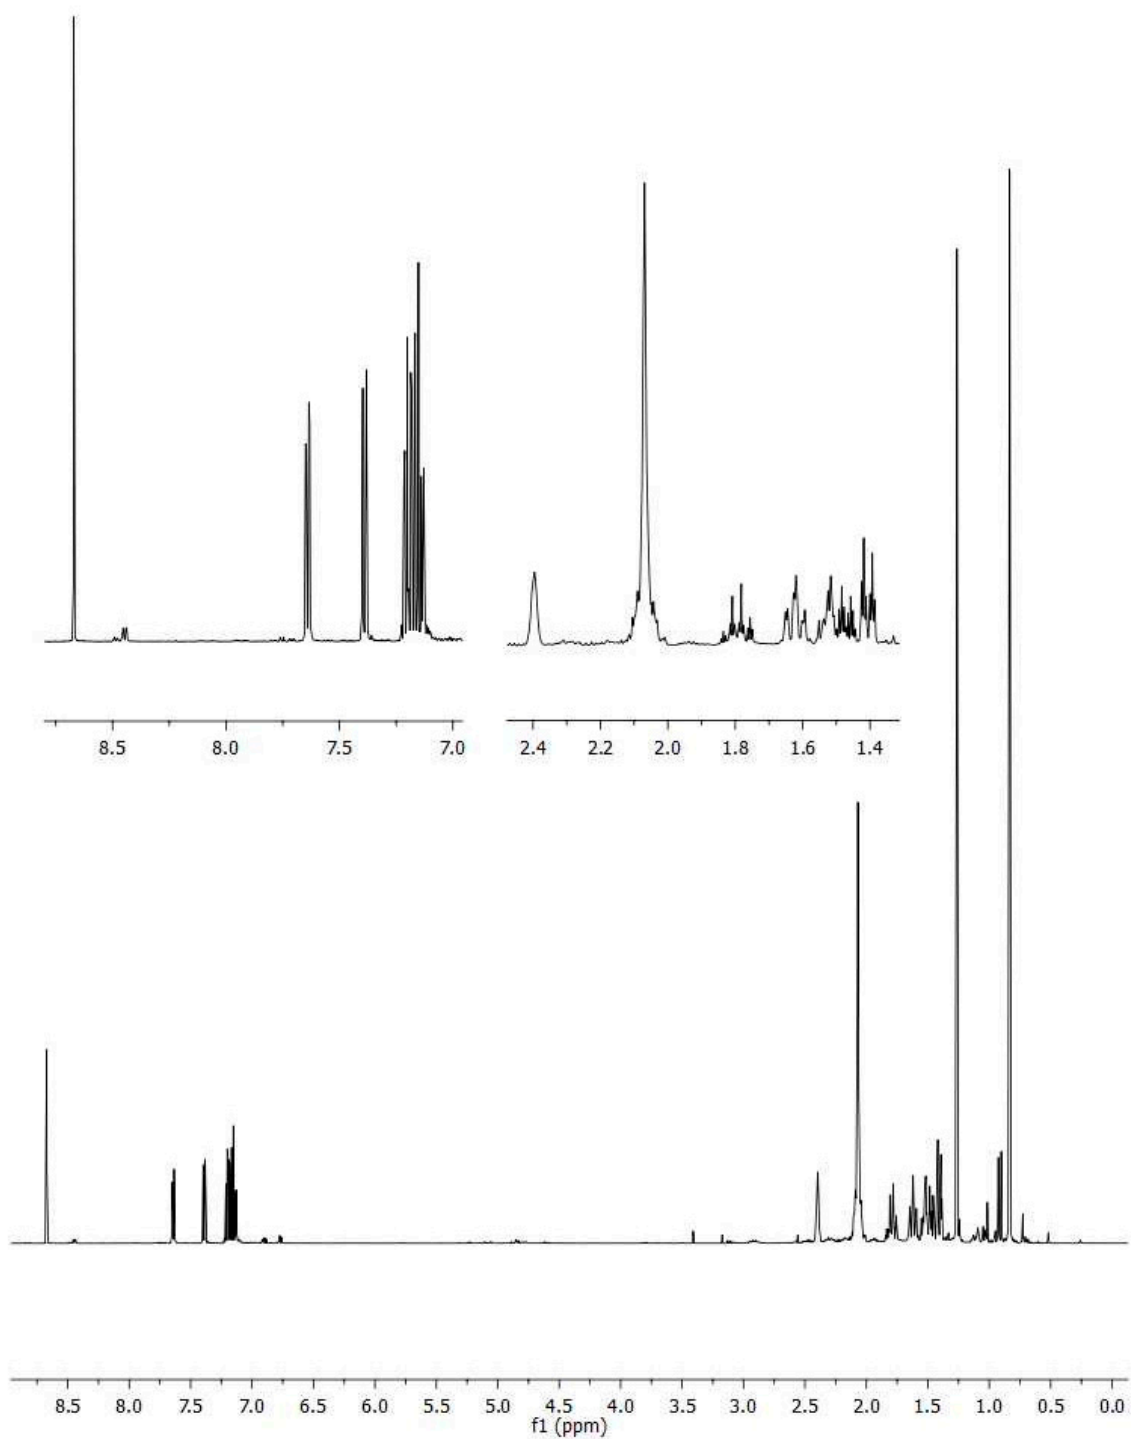

**Figure S13.**  $^1\text{H-NMR}$  (500 MHz, benzene- $d_6$ ) spectra of **1** after heating with paraformaldehyde for 24 h.

## S2 FTIR Spectra

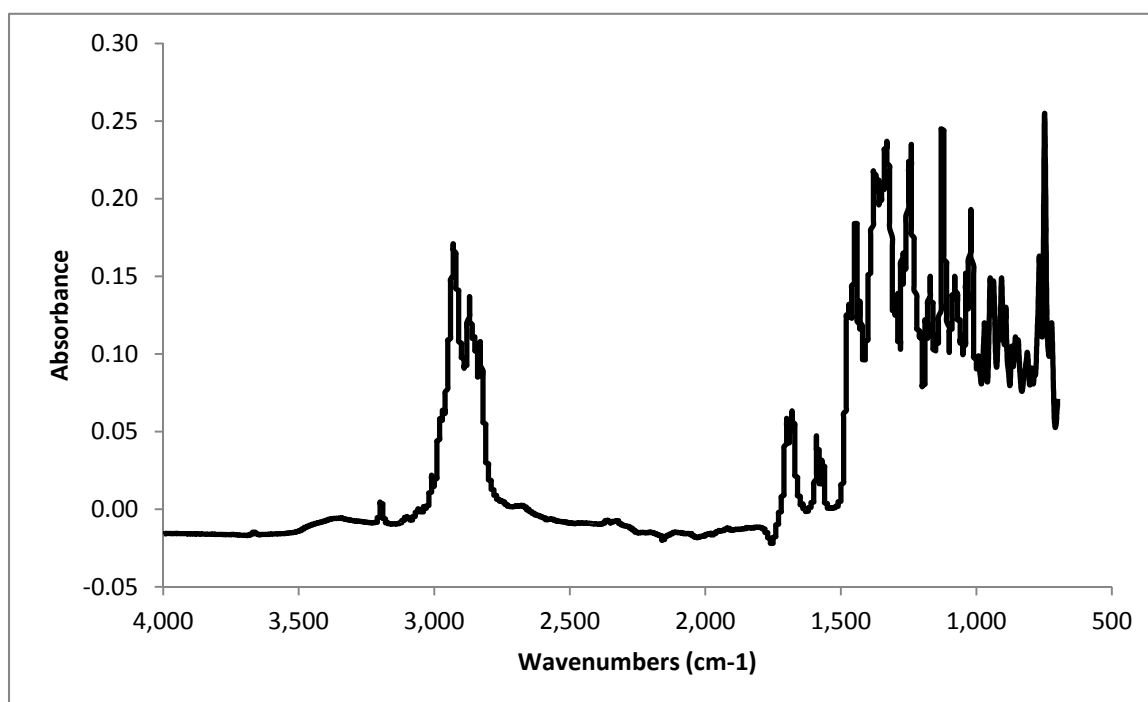

Figure S14. FTIR spectra of 1.

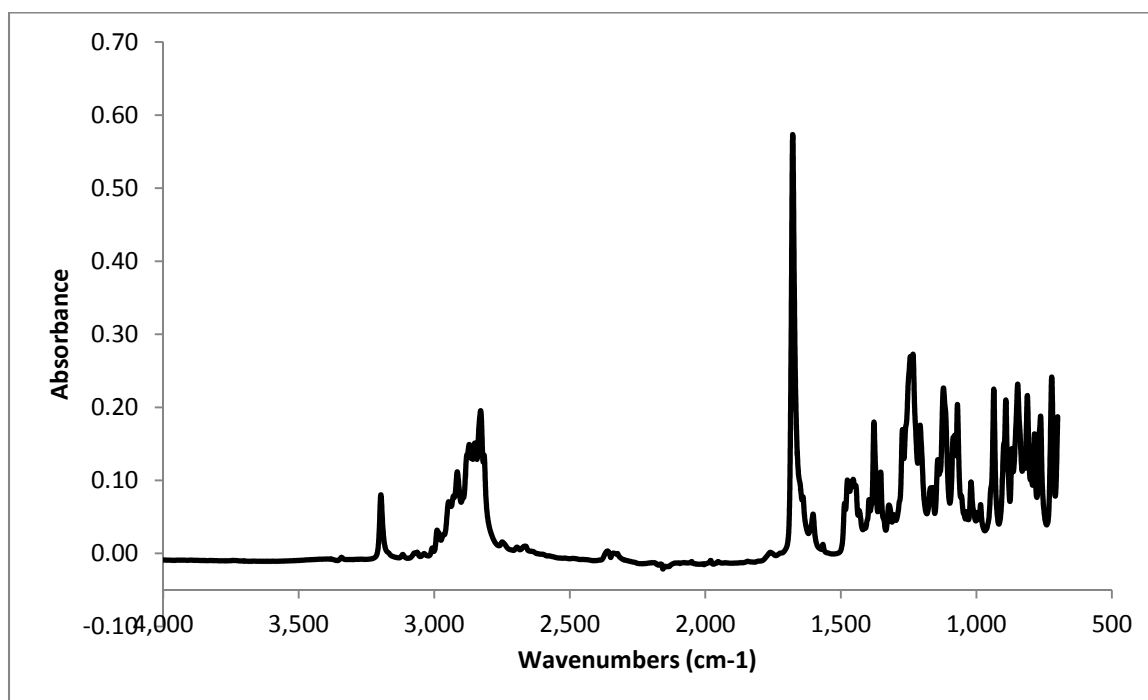

Figure S15. FTIR spectra of 3.

## S3 Calculations

### General Information

All the calculations were performed on the full structures of the reported compounds. Calculations were performed with the GAUSSIAN 09 suite of programs [1]. The  $\omega$ B97XD functional [2] was qualified as promising by Grimme [3] and was used to accurately describe the mechanism of FLP mediated hydrogenation of alkynes [4] and was thus used in combination with the 6-31G\*\* basis set for all atoms [5,6]. The transition states were located and confirmed by frequency calculations (single imaginary frequency). The stationary points were characterized as minima by full vibration frequencies calculations (no imaginary frequency). All geometry optimizations were carried out without any symmetry constraints. The energies were then refined by single point calculations to include solvent effects using the SMD solvation model [7] with the experimental solvent (benzene) at the  $\omega$ B97XD/6-31++G\*\* level of theory [8]. All structures with their associated free enthalpy and Gibbs free energies as well as their cartesian coordinates are fully detailed in the following section.

1

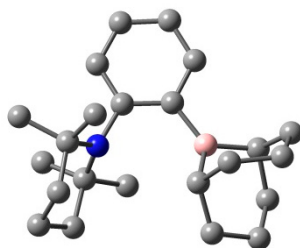

**Sum of electronic and thermal Enthalpies= -976.987198**

**Sum of electronic and thermal Free Energies= -977.060951**

|   |             |             |             |   |             |             |             |
|---|-------------|-------------|-------------|---|-------------|-------------|-------------|
| C | -0.02940000 | 10.91230000 | 11.37160000 | C | 4.29290000  | 12.65110000 | 12.23500000 |
| H | 0.37370000  | 11.58720000 | 11.92390000 | H | 4.91970000  | 12.64820000 | 12.92210000 |
| H | -0.83760000 | 10.60030000 | 11.78540000 | C | 3.99760000  | 13.82550000 | 11.56860000 |
| H | -0.23390000 | 11.28360000 | 10.51020000 | H | 4.44410000  | 14.61260000 | 11.78270000 |
| C | 1.27590000  | 9.22900000  | 12.62580000 | C | 3.02670000  | 13.81580000 | 10.57560000 |
| H | 1.79470000  | 8.42330000  | 12.56420000 | H | 2.79990000  | 14.61830000 | 10.16600000 |
| H | 0.46080000  | 9.04770000  | 13.09900000 | C | 2.37130000  | 12.63890000 | 10.16360000 |
| H | 1.77810000  | 9.89800000  | 13.09630000 | B | 1.27550000  | 12.79380000 | 9.04190000  |
| C | 0.94400000  | 9.73920000  | 11.20420000 | C | 1.09250000  | 11.94080000 | 7.73980000  |
| C | 0.20580000  | 8.64670000  | 10.41170000 | H | 1.61760000  | 11.11650000 | 7.81720000  |
| H | -0.46460000 | 8.24490000  | 10.98600000 | C | -0.38270000 | 11.58000000 | 7.47680000  |
| H | -0.25630000 | 9.06100000  | 9.66550000  | H | -0.45070000 | 11.20570000 | 6.58450000  |
| C | 1.11240000  | 7.54980000  | 9.87620000  | H | -0.64280000 | 10.88690000 | 8.10240000  |
| H | 0.59710000  | 6.93340000  | 9.33370000  | C | -1.38180000 | 12.73190000 | 7.59370000  |
| H | 1.50110000  | 7.05480000  | 10.61440000 | H | -1.35100000 | 13.25560000 | 6.77780000  |
| C | 2.21650000  | 8.17600000  | 9.03660000  | H | -2.27560000 | 12.36350000 | 7.67320000  |
| H | 1.82010000  | 8.63400000  | 8.27930000  | C | -1.12780000 | 13.65770000 | 8.77870000  |
| H | 2.79170000  | 7.47430000  | 8.69200000  | H | -1.43910000 | 13.21760000 | 9.58460000  |
| C | 3.06420000  | 9.17370000  | 9.84260000  | H | -1.66010000 | 14.46080000 | 8.66180000  |
| C | 3.94310000  | 8.38290000  | 10.84550000 | C | 0.34710000  | 14.07590000 | 8.98760000  |
| H | 4.51540000  | 8.99080000  | 11.31780000 | H | 0.42700000  | 14.56900000 | 9.83150000  |
| H | 4.47880000  | 7.74570000  | 10.36760000 | C | 0.89630000  | 14.95430000 | 7.82590000  |
| H | 3.37900000  | 7.92220000  | 11.47140000 | H | 0.28800000  | 15.69830000 | 7.68970000  |
| C | 4.03190000  | 9.87090000  | 8.87600000  | H | 1.75080000  | 15.32440000 | 8.09830000  |
| H | 3.53170000  | 10.37440000 | 8.22990000  | C | 1.08500000  | 14.23530000 | 6.49220000  |
| H | 4.56330000  | 9.21090000  | 8.42460000  | H | 1.65000000  | 14.77780000 | 5.91940000  |
| H | 4.60550000  | 10.46170000 | 9.36940000  | H | 0.22240000  | 14.14760000 | 6.05790000  |
| N | 2.11940000  | 10.19430000 | 10.40260000 | C | 1.71430000  | 12.84260000 | 6.63510000  |
| C | 2.72210000  | 11.43650000 | 10.81900000 | H | 2.66000000  | 12.95000000 | 6.82310000  |
| C | 3.64780000  | 11.47370000 | 11.87290000 | H | 1.63780000  | 12.38250000 | 5.78510000  |
| H | 3.83420000  | 10.69140000 | 12.34070000 |   |             |             |             |

**H<sub>2</sub>**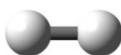

**Sum of electronic and thermal Enthalpies= -1.161392**

**Sum of electronic and thermal Free Energies= -1.176183**

|   |            |            |            |
|---|------------|------------|------------|
| H | 2.78486400 | 0.63636400 | 0.00000000 |
| H | 2.04240800 | 0.63636400 | 0.00000000 |

**CO<sub>2</sub>**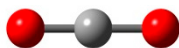

**Sum of electronic and thermal Enthalpies= -188.512018**

**Sum of electronic and thermal Free Energies= -188.536311**

|   |            |            |            |   |             |            |            |
|---|------------|------------|------------|---|-------------|------------|------------|
| C | 0.00000000 | 0.00000000 | 0.00000000 | O | -1.16509200 | 0.00000000 | 0.00000000 |
| O | 1.16509200 | 0.00000000 | 0.00000000 |   |             |            |            |

**H<sub>2</sub>O**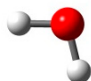

**Sum of electronic and thermal Enthalpies= -76.388650**

**Sum of electronic and thermal Free Energies= -76.410723**

|   |            |             |            |   |            |            |            |
|---|------------|-------------|------------|---|------------|------------|------------|
| O | 1.69129100 | -0.38241200 | 0.00000000 | H | 1.41184600 | 0.53576200 | 0.00000000 |
| H | 2.65004500 | -0.33932300 | 0.00000000 |   |            |            |            |

**MeOH**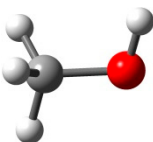

**Sum of electronic and thermal Enthalpies= -115.642510**

**Sum of electronic and thermal Free Energies= -115.669602**

|   |            |             |             |   |             |             |             |
|---|------------|-------------|-------------|---|-------------|-------------|-------------|
| C | 1.04382800 | -0.34318700 | 0.00001500  | H | 1.45656500  | 0.15130600  | -0.89140700 |
| H | 1.39202900 | -1.37859800 | -0.00002200 | O | -0.36445800 | -0.38082300 | 0.00006200  |
| H | 1.45662600 | 0.15126300  | 0.89143300  | H | -0.68595400 | 0.52317900  | 0.00009400  |

**HCOOH**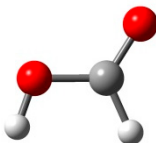

**Sum of electronic and thermal Enthalpies= -189.673112**

**Sum of electronic and thermal Free Energies= -189.701396**

|   |             |            |             |   |             |            |             |
|---|-------------|------------|-------------|---|-------------|------------|-------------|
| C | -2.45213200 | 1.22360500 | 0.03489100  | O | -1.82326800 | 1.43662800 | -1.13406800 |
| H | -3.45994100 | 0.78067000 | -0.07696100 | H | -2.38460800 | 1.15653100 | -1.86461500 |
| O | -1.95848300 | 1.49085500 | 1.08980600  |   |             |            |             |



CH<sub>2</sub>O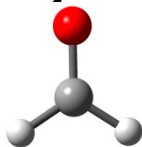

Sum of electronic and thermal Enthalpies= -114.441277

Sum of electronic and thermal Free Energies= -114.466744

|   |             |             |             |   |             |             |             |
|---|-------------|-------------|-------------|---|-------------|-------------|-------------|
| C | -5.08872300 | -1.59576700 | 0.02649700  | H | -5.12832600 | -1.07917100 | -0.95364700 |
| H | -5.12834800 | -2.70298200 | -0.01622000 | O | -5.01005600 | -0.99560100 | 1.06596900  |

1-H<sub>2</sub>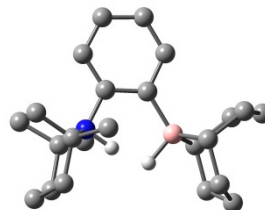

Sum of electronic and thermal Enthalpies= -978.152325

Sum of electronic and thermal Free Energies= -978.226136

|   |            |             |             |   |             |             |             |
|---|------------|-------------|-------------|---|-------------|-------------|-------------|
| C | 1.62769700 | 5.99265400  | 1.22660300  | H | 1.01832600  | 8.86912300  | 1.89732300  |
| C | 1.17872100 | 5.17175500  | 2.27867300  | H | 0.93167400  | 10.30934000 | 0.86599200  |
| C | 2.67464100 | 6.86199600  | 1.59031100  | C | 4.54031000  | 5.87991600  | -0.36497900 |
| C | 1.71576300 | 5.20886800  | 3.55982300  | H | 3.69784400  | 5.60463600  | -1.00273600 |
| H | 0.37526900 | 4.47148700  | 2.08619000  | H | 5.46674700  | 5.62940600  | -0.88917400 |
| C | 3.23508400 | 6.92335700  | 2.86521900  | H | 4.48787800  | 5.28367500  | 0.54786300  |
| C | 2.75118900 | 6.08733200  | 3.86210400  | H | 2.51582400  | 7.40042400  | -0.26096900 |
| H | 1.32517500 | 4.54617200  | 4.32655700  | H | 1.60318200  | 6.77871100  | -1.01001600 |
| H | 4.03942100 | 7.61205300  | 3.09117100  | B | 0.99469400  | 5.93399800  | -0.28593900 |
| H | 3.18038900 | 6.12552600  | 4.85789100  | C | 1.15639400  | 4.50953400  | -1.08081700 |
| C | 2.76653800 | 9.22716700  | 0.63275300  | C | -0.58964600 | 6.32643900  | -0.43116200 |
| C | 4.55276700 | 7.38261000  | -0.06330100 | C | 0.24666200  | 3.41834700  | -0.48052800 |
| C | 3.03024300 | 9.87527700  | -0.73654100 | C | 0.87731500  | 4.77602100  | -2.57440300 |
| C | 4.69623700 | 8.14860900  | -1.38932700 | H | 2.18119600  | 4.11150600  | -1.01774100 |
| C | 4.44139300 | 9.64613300  | -1.26521700 | C | -1.50005400 | 5.24114500  | 0.17744800  |
| H | 2.81354500 | 10.94411300 | -0.64418100 | C | -0.86993300 | 6.58594100  | -1.92626900 |
| H | 2.30957600 | 9.46715600  | -1.45713800 | H | -0.83850900 | 7.25835300  | 0.10004900  |
| H | 5.69862300 | 7.95077000  | -1.78171100 | H | 0.65981400  | 3.13528800  | 0.49552200  |
| H | 3.98492400 | 7.72594000  | -2.11095100 | C | -1.23750000 | 3.80240000  | -0.31137400 |
| H | 4.54967400 | 10.12089300 | -2.24478600 | H | 0.29627900  | 2.50355700  | -1.09022900 |
| H | 5.18455900 | 10.11577300 | -0.61049800 | H | 1.67292600  | 5.43634900  | -2.94927200 |
| N | 3.16824500 | 7.74392700  | 0.51069100  | H | 0.94901400  | 3.84576800  | -3.15816100 |
| C | 3.48531600 | 9.98105700  | 1.75298000  | C | -0.48228900 | 5.43473100  | -2.87385300 |
| H | 3.07129700 | 10.99281000 | 1.78359100  | H | -2.55760700 | 5.47934000  | -0.01140800 |
| H | 3.29847100 | 9.52720700  | 2.72663000  | H | -1.38592900 | 5.27908900  | 1.26803500  |
| H | 4.56025900 | 10.07491900 | 1.60384200  | H | -0.30430400 | 7.48253600  | -2.21929900 |
| C | 5.71984400 | 7.67836300  | 0.88005400  | H | -1.93157200 | 6.82577200  | -2.08975400 |
| H | 5.62479700 | 7.13383700  | 1.81988100  | H | -1.75342600 | 3.65169400  | -1.26365000 |
| H | 6.63233400 | 7.32453000  | 0.39220000  | H | -1.71098600 | 3.09694300  | 0.38402900  |
| H | 5.85740000 | 8.73723100  | 1.09522400  | H | -1.26432800 | 4.67047500  | -2.84899500 |
| C | 1.25966400 | 9.26711100  | 0.91001800  | H | -0.47927500 | 5.80840600  | -3.90611500 |
| H | 0.69919600 | 8.69772000  | 0.16576300  |   |             |             |             |

1-CO<sub>2</sub>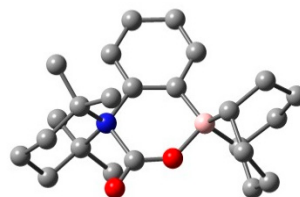

Sum of electronic and thermal Enthalpies= -1165.471444

Sum of electronic and thermal Free Energies= -1165.544557

|   |             |             |            |   |             |             |            |
|---|-------------|-------------|------------|---|-------------|-------------|------------|
| C | -0.26334300 | -0.65151600 | 1.31715400 | C | 0.15283000  | -0.93575200 | 3.73150900 |
| C | -0.52945200 | -1.24235800 | 2.57016200 | H | -1.31638800 | -1.98158100 | 2.62506200 |
| C | 0.76453600  | 0.30496900  | 1.29336900 | C | 1.46007100  | 0.61901700  | 2.47201600 |

|   |             |             |             |   |             |             |             |
|---|-------------|-------------|-------------|---|-------------|-------------|-------------|
| C | 1.16662100  | 0.01196600  | 3.67945700  | H | 2.21086300  | -1.43001200 | -0.16586400 |
| H | -0.10110900 | -1.42866900 | 4.66473100  | H | 2.09664000  | -0.86907600 | -1.84961400 |
| H | 2.24319800  | 1.35237200  | 2.48060900  | H | 3.67342500  | -1.07169900 | -1.09564300 |
| H | 1.72902200  | 0.28717300  | 4.56562800  | B | -1.13969600 | -1.09992000 | 0.05021700  |
| C | 0.81308100  | 2.61522300  | 0.15253900  | C | -1.13685900 | -2.67431800 | -0.37320700 |
| C | 2.67106400  | 0.69178500  | -0.40822300 | C | -2.70281200 | -0.63750100 | 0.04223100  |
| C | 1.46587400  | 3.42405800  | -0.98979900 | C | -1.95800300 | -3.52676300 | 0.61735000  |
| C | 3.16429200  | 1.65044900  | -1.51316000 | C | -1.67599800 | -2.78875800 | -1.81768600 |
| C | 2.94781700  | 3.12370700  | -1.18548400 | H | -0.11585100 | -3.08695700 | -0.37976000 |
| H | 1.33164300  | 4.47912400  | -0.73089300 | C | -3.50068800 | -1.45524600 | 1.07738700  |
| H | 0.93622000  | 3.25320900  | -1.92326600 | C | -3.25533100 | -0.77414600 | -1.39370900 |
| H | 4.23305900  | 1.44908900  | -1.63738800 | H | -2.81403000 | 0.42160400  | 0.32351500  |
| H | 2.68130800  | 1.41665100  | -2.45909000 | H | -1.37999700 | -3.64477100 | 1.54116000  |
| H | 3.33199100  | 3.73481900  | -2.00751300 | C | -3.36744000 | -2.98898400 | 0.95605100  |
| H | 3.52337300  | 3.41259900  | -0.29749900 | H | -2.06921300 | -4.54647900 | 0.22147300  |
| N | 1.16387800  | 1.05281800  | 0.02481700  | H | -0.96063400 | -2.30621400 | -2.49292700 |
| C | 1.25359900  | 3.26806800  | 1.47315100  | H | -1.71878200 | -3.84573700 | -2.11800300 |
| H | 0.99296700  | 4.32552000  | 1.38598800  | C | -3.06403400 | -2.15925000 | -2.04065400 |
| H | 0.72569200  | 2.87694400  | 2.34032700  | H | -4.56831000 | -1.20053700 | 1.01323700  |
| H | 2.32945700  | 3.22381600  | 1.64800800  | H | -3.18814600 | -1.13855100 | 2.07993600  |
| C | 3.70336800  | 0.74562100  | 0.72952100  | H | -2.75391600 | -0.02817800 | -2.02197300 |
| H | 3.54062400  | -0.01562000 | 1.48994300  | H | -4.32571000 | -0.52245200 | -1.41233600 |
| H | 4.67005300  | 0.53627600  | 0.26550100  | H | -4.07003000 | -3.33984700 | 0.19605400  |
| H | 3.78962300  | 1.72490700  | 1.20217400  | H | -3.70822900 | -3.44960900 | 1.89216300  |
| C | -0.71603900 | 2.71855000  | 0.09698000  | H | -3.83426400 | -2.84309100 | -1.67225000 |
| H | -1.12672600 | 2.43000800  | -0.87175500 | H | -3.24579800 | -2.07308500 | -3.11904600 |
| H | -1.18223000 | 2.11001800  | 0.87643200  | O | -0.46388900 | -0.36251100 | -1.14292300 |
| H | -0.99261500 | 3.76162800  | 0.27039500  | C | 0.32427700  | 0.59233900  | -1.27709900 |
| C | 2.64295600  | -0.75749000 | -0.91196600 | O | 0.56882600  | 1.19363700  | -2.29296600 |

**1-H2O (2)**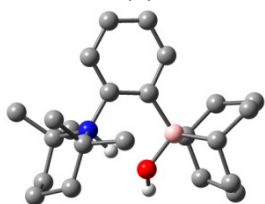

**Sum of electronic and thermal Enthalpies= -1053.400185**

**Sum of electronic and thermal Free Energies= -1053.474466**

|   |             |            |             |   |            |             |             |
|---|-------------|------------|-------------|---|------------|-------------|-------------|
| C | 0.24691600  | 3.08335500 | 0.20261800  | O | 1.24733500 | 6.72741500  | -1.02432400 |
| C | 0.88708800  | 4.17095800 | -0.68241400 | N | 3.01900100 | 7.67690200  | 0.43365400  |
| C | -0.91224400 | 5.87992100 | 0.09342700  | C | 2.59328500 | 9.15188700  | 0.55023900  |
| C | -1.60113300 | 4.79658200 | 0.94708600  | C | 4.37201500 | 7.33149100  | -0.20704500 |
| H | 0.86536500  | 2.96949500 | 1.09951000  | H | 2.32082100 | 7.31000900  | -0.33447100 |
| H | -2.69406200 | 4.89007100 | 0.86136600  | C | 2.74994900 | 9.76708700  | -0.85109900 |
| H | -1.38321000 | 4.99883300 | 2.00157900  | C | 3.36195500 | 9.96577100  | 1.59531700  |
| C | 0.28229600  | 4.17769600 | -2.10598600 | C | 1.10635900 | 9.17068100  | 0.93068300  |
| H | 0.91750800  | 4.78894900 | -2.77078600 | C | 4.42183300 | 8.06472300  | -1.55991500 |
| H | 0.33294100  | 3.17133700 | -2.54566900 | C | 5.60357200 | 7.67101700  | 0.63773200  |
| C | -1.47634600 | 5.93159600 | -1.34396100 | C | 4.37424900 | 5.81931700  | -0.46567100 |
| H | -1.06175300 | 6.81839400 | -1.83896200 | C | 4.13222700 | 9.55807600  | -1.45914300 |
| H | 1.94780700  | 3.89322300 | -0.79393900 | H | 2.51154300 | 10.83279600 | -0.77773200 |
| H | -1.15136300 | 6.84884900 | 0.55929600  | H | 1.99718700 | 9.31367700  | -1.50720200 |
| C | -1.22135700 | 3.33453400 | 0.61332400  | H | 2.94583300 | 10.97728800 | 1.59252800  |
| H | -1.87339600 | 2.97565400 | -0.18771500 | H | 3.22247800 | 9.56403900  | 2.59928500  |
| H | -1.46036600 | 2.69890000 | 1.47605200  | H | 4.42902300 | 10.05432100 | 1.39357100  |
| H | 0.29569200  | 2.10864500 | -0.30498100 | H | 0.51355000 | 8.56423900  | 0.24323200  |
| C | -1.16889800 | 4.68882400 | -2.20114200 | H | 0.94600800 | 8.80333400  | 1.94634000  |
| H | -1.84698900 | 3.88075600 | -1.91417200 | H | 0.75333300 | 10.20474400 | 0.87939000  |
| H | -1.40466700 | 4.90388000 | -3.25136200 | H | 5.40518900 | 7.88369500  | -2.00539000 |
| H | -2.56637200 | 6.07600000 | -1.32417300 | H | 3.68299500 | 7.60713300  | -2.22962800 |
| B | 0.71159700  | 5.66652000 | -0.02063400 | H | 5.60990400 | 7.12243200  | 1.57978500  |
| C | 1.56924300  | 5.90808900 | 1.38462200  | H | 6.48618800 | 7.35431900  | 0.07432700  |
| C | 1.26516200  | 5.15421400 | 2.53687400  | H | 5.71712100 | 8.73422900  | 0.84571400  |
| C | 2.62478200  | 6.82388800 | 1.57740400  | H | 3.48697400 | 5.50945300  | -1.02071200 |
| C | 1.92917900  | 5.28129400 | 3.74975900  | H | 5.26074200 | 5.56750400  | -1.05462400 |
| H | 0.46712500  | 4.42693700 | 2.48698900  | H | 4.40512200 | 5.25225800  | 0.46672500  |
| C | 3.30637400  | 6.97457600 | 2.78725900  | H | 4.17010800 | 10.00913600 | -2.45530900 |
| C | 2.96270400  | 6.20032100 | 3.88451900  | H | 4.90118100 | 10.06341600 | -0.86324800 |
| H | 1.63505600  | 4.66083900 | 4.59120800  | H | 1.29654400 | 6.36264500  | -1.90879700 |
| H | 4.10504800  | 7.69877300 | 2.87928100  |   |            |             |             |
| H | 3.49162800  | 6.31852100 | 4.82457800  |   |            |             |             |

## 1-MeOH

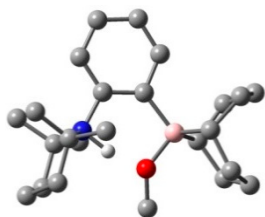

**Sum of electronic and thermal Enthalpies= -1092.646982**

**Sum of electronic and thermal Free Energies= -1092.724062**

|   |             |            |             |   |            |             |             |
|---|-------------|------------|-------------|---|------------|-------------|-------------|
| C | 0.29885000  | 3.08122600 | 0.18710700  | N | 3.00794300 | 7.71412500  | 0.39413500  |
| C | 0.80362700  | 4.14277700 | -0.81099500 | C | 2.58180800 | 9.18556300  | 0.54753200  |
| C | -0.89819400 | 5.88153500 | 0.10252000  | C | 4.38271500 | 7.38599800  | -0.21051600 |
| C | -1.53553600 | 4.79716900 | 1.00130900  | H | 2.29859400 | 7.35926400  | -0.38161100 |
| H | 1.00141000  | 3.00599800 | 1.02194700  | C | 2.79974600 | 9.85339400  | -0.82057300 |
| H | -2.63169800 | 4.86751000 | 0.93765200  | C | 3.30727700 | 9.96795800  | 1.64784000  |
| H | -1.30179500 | 5.03173600 | 2.04438200  | C | 1.08150300 | 9.19401000  | 0.87116800  |
| C | -0.02347600 | 4.02978500 | -2.12153200 | C | 4.51408000 | 8.18131800  | -1.52153100 |
| H | 0.54854900  | 4.44762200 | -2.95249500 | C | 5.58271300 | 7.67241900  | 0.69915300  |
| H | -0.13937200 | 2.96558000 | -2.37420700 | C | 4.38332200 | 5.88539200  | -0.53276400 |
| C | -1.59430500 | 5.94695100 | -1.26856300 | C | 4.20870900 | 9.66786400  | -1.37347200 |
| H | -1.20814300 | 6.81543400 | -1.81432200 | H | 2.55980900 | 10.91611600 | -0.71629600 |
| H | 1.83974100  | 3.86623900 | -1.06592800 | H | 2.07379100 | 9.43704000  | -1.52876800 |
| H | -1.07959600 | 6.84812500 | 0.59774900  | H | 2.92245600 | 10.99166200 | 1.62649400  |
| C | -1.13860100 | 3.32804800 | 0.69966100  | H | 3.09228200 | 9.56547000  | 2.63761400  |
| H | -1.83311500 | 2.92308900 | -0.04196300 | H | 4.38723400 | 10.02520700 | 1.51518600  |
| H | -1.30613200 | 2.72408200 | 1.60120000  | H | 0.51523600 | 8.62000700  | 0.13526300  |
| H | 0.31749100  | 2.09092600 | -0.29070100 | H | 0.88429800 | 8.77605900  | 1.86055100  |
| C | -1.43450600 | 4.66737700 | -2.11068600 | H | 0.73193000 | 10.23040500 | 0.85919100  |
| H | -2.15642700 | 3.93066300 | -1.74564900 | H | 5.52841400 | 8.02868800  | -1.90364700 |
| H | -1.73787400 | 4.87302800 | -3.14563200 | H | 3.83617100 | 7.75029700  | -2.26506900 |
| H | -2.67045500 | 6.13550600 | -1.14008200 | H | 5.54905900 | 7.08285700  | 1.61505300  |
| B | 0.70745700  | 5.64275400 | -0.13755800 | H | 6.48298200 | 7.37141200  | 0.15565300  |
| C | 1.59410800  | 5.87377800 | 1.27494800  | H | 5.69907500 | 8.72459200  | 0.95769900  |
| C | 1.30259500  | 5.10061500 | 2.42079900  | H | 3.50216700 | 5.59429700  | -1.10737000 |
| C | 2.60652800  | 6.82905300 | 1.50994900  | H | 5.27563100 | 5.65590100  | -1.12206000 |
| C | 1.93295000  | 5.23780500 | 3.64972700  | H | 4.40447900 | 5.28081300  | 0.37607300  |
| H | 0.53511200  | 4.34600400 | 2.36108600  | H | 4.29184800 | 10.15846900 | -2.34800500 |
| C | 3.25577300  | 6.99095500 | 2.73732000  | H | 4.94526700 | 10.15172000 | -0.72165400 |
| C | 2.92507600  | 6.19396800 | 3.82013800  | C | 1.38791100 | 6.73130100  | -2.48477700 |
| H | 1.64127800  | 4.59472200 | 4.47482100  | H | 2.09407600 | 5.95370200  | -2.81077600 |
| H | 4.02399000  | 7.74304900 | 2.85208300  | H | 0.43697700 | 6.56550100  | -2.99738600 |
| H | 3.43020400  | 6.32312600 | 4.77170600  | H | 1.77315400 | 7.70062900  | -2.82813000 |
| O | 1.23877200  | 6.77757000 | -1.09406200 |   |            |             |             |

## 1-HCOOH (3)

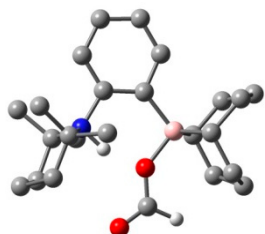

**Sum of electronic and thermal Enthalpies= -1166.690769**

**Sum of electronic and thermal Free Energies= -1166.768467**

|   |             |            |             |   |             |            |             |
|---|-------------|------------|-------------|---|-------------|------------|-------------|
| C | 0.22839500  | 3.03636600 | 0.29520800  | H | 0.16485500  | 2.89697300 | -2.38456300 |
| C | 0.82789800  | 4.07275700 | -0.68066800 | C | -1.63991900 | 5.72692000 | -1.32670500 |
| C | -0.95285100 | 5.82708400 | 0.05286800  | H | -1.41370800 | 6.63217400 | -1.90006400 |
| C | -1.57514600 | 4.80833700 | 1.03260000  | H | 1.88778600  | 3.80664900 | -0.81283800 |
| H | 0.89193100  | 2.93924800 | 1.15952900  | H | -1.17990200 | 6.82814300 | 0.45018400  |
| H | -2.67028100 | 4.90040000 | 1.00309000  | C | -1.21731500 | 3.32767400 | 0.76205200  |
| H | -1.29973600 | 5.08314800 | 2.05500300  | H | -1.90831700 | 2.93903400 | 0.00884700  |
| C | 0.16234600  | 3.94951400 | -2.06775000 | H | -1.42517900 | 2.74100600 | 1.66614100  |
| H | 0.78983400  | 4.45942900 | -2.80648800 | H | 0.23537100  | 2.04478000 | -0.17908500 |

|   |             |            |             |   |            |             |             |
|---|-------------|------------|-------------|---|------------|-------------|-------------|
| C | -1.29309700 | 4.46786000 | -2.15691700 | C | 3.31199700 | 9.93773200  | 1.70369400  |
| H | -1.96406500 | 3.66099600 | -1.85045700 | C | 1.11651300 | 9.23960200  | 0.77364100  |
| H | -1.54066200 | 4.65507800 | -3.21007000 | C | 4.59316400 | 8.23225700  | -1.51049300 |
| H | -2.73082600 | 5.75254800 | -1.19449000 | C | 5.60087800 | 7.57598200  | 0.71103500  |
| B | 0.66013100  | 5.59498300 | -0.10360800 | C | 4.36267500 | 5.89941100  | -0.63780500 |
| C | 1.56195500  | 5.91843500 | 1.26909300  | C | 4.36843400 | 9.72241300  | -1.28134200 |
| C | 1.27750400  | 5.16214200 | 2.42834200  | H | 2.72714000 | 10.99844600 | -0.64648100 |
| C | 2.60602700  | 6.84828500 | 1.47319400  | H | 2.25704400 | 9.56300100  | -1.56187500 |
| C | 1.93190500  | 5.29208900 | 3.64451000  | H | 2.98759800 | 10.98156200 | 1.67216800  |
| H | 0.49700700  | 4.42067300 | 2.38615100  | H | 3.00417400 | 9.53286300  | 2.66769700  |
| C | 3.28211800  | 6.99769900 | 2.68766300  | H | 4.40041100 | 9.93688300  | 1.64677300  |
| C | 2.95206300  | 6.22197000 | 3.78519100  | H | 0.57825900 | 8.71486800  | -0.01837200 |
| H | 1.63978300  | 4.66239200 | 4.47942900  | H | 0.85190400 | 8.78355700  | 1.72992200  |
| H | 4.07353500  | 7.72700300 | 2.78093800  | H | 0.78433700 | 10.28124500 | 0.78420900  |
| H | 3.48092200  | 6.34675700 | 4.72416100  | H | 5.59794600 | 8.03916900  | -1.89946100 |
| O | 1.24814400  | 6.64229800 | -1.17277300 | H | 3.87687100 | 7.89307000  | -2.26552800 |
| C | 1.05130600  | 6.96507500 | -2.42813500 | H | 5.57167600 | 6.87479200  | 1.54526100  |
| H | 0.27551400  | 6.39975600 | -2.95471600 | H | 6.51117000 | 7.36443500  | 0.14317900  |
| O | 1.68460500  | 7.83934900 | -2.99057600 | H | 5.69318400 | 8.58951900  | 1.10117100  |
| N | 3.03397400  | 7.73253600 | 0.36031300  | H | 3.52323600 | 5.69168000  | -1.30431200 |
| C | 2.63140800  | 9.22089300 | 0.53433800  | H | 5.28874000 | 5.65032200  | -1.16306100 |
| C | 4.41916800  | 7.38031800 | -0.24271400 | H | 4.27691700 | 5.24969700  | 0.23579700  |
| H | 2.38453200  | 7.42712900 | -0.40933100 | H | 4.51125300 | 10.25778200 | -2.22425000 |
| C | 2.94040700  | 9.93469000 | -0.79174200 | H | 5.09971100 | 10.13298700 | -0.57400600 |

**1-CH<sub>2</sub>O**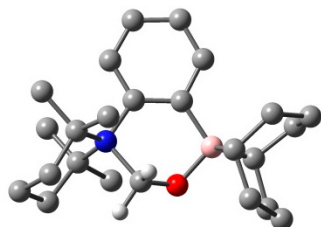

**Sum of electronic and thermal Enthalpies= -1091.430292**

**Sum of electronic and thermal Free Energies= -1091.503354**

|   |             |             |             |   |             |             |             |
|---|-------------|-------------|-------------|---|-------------|-------------|-------------|
| C | -0.24072300 | -0.71235900 | 1.33504800  | H | -1.03077600 | 2.03240900  | 1.34903600  |
| C | -0.54624800 | -1.28199500 | 2.58684100  | H | -0.78866600 | 3.76669000  | 1.13230100  |
| C | 0.78211700  | 0.25865000  | 1.35490400  | C | 2.66446800  | -0.73459800 | -0.86378800 |
| C | 0.11228400  | -0.97266400 | 3.76484500  | H | 2.35363900  | -1.40554500 | -0.06036300 |
| H | -1.34045200 | -2.01528800 | 2.62798400  | H | 2.04400000  | -0.95360400 | -1.72895000 |
| C | 1.47488800  | 0.55897700  | 2.53586500  | H | 3.70757400  | -0.95155600 | -1.11144700 |
| C | 1.15049000  | -0.05060800 | 3.73657800  | B | -1.00677600 | -1.21030100 | -0.01883300 |
| H | -0.17310700 | -1.45602200 | 4.69436200  | C | -1.15423000 | -2.81885300 | -0.27111800 |
| H | 2.27602800  | 1.27657600  | 2.54712400  | C | -2.52333400 | -0.60925500 | -0.19934500 |
| H | 1.70342500  | 0.20404600  | 4.63500300  | C | -2.16294600 | -3.50048900 | 0.67674900  |
| C | 0.82022600  | 2.59846400  | 0.31618200  | C | -1.54992200 | -3.00628800 | -1.75340600 |
| C | 2.59977900  | 0.73487700  | -0.41586700 | H | -0.18790400 | -3.32811300 | -0.13300200 |
| C | 1.17413100  | 3.32983600  | -0.99223000 | C | -3.46040400 | -1.23687100 | 0.85119800  |
| C | 2.92275800  | 1.64843500  | -1.62094900 | C | -2.97300200 | -0.84062900 | -1.65708600 |
| C | 2.62826600  | 3.12919400  | -1.40534500 | H | -2.57724600 | 0.47918900  | -0.02427700 |
| H | 0.96410700  | 4.39151000  | -0.82972600 | H | -1.69164100 | -3.62956000 | 1.65776700  |
| H | 0.50782300  | 3.01797800  | -1.80162000 | C | -3.51767400 | -2.77758600 | 0.85244500  |
| H | 3.98439900  | 1.50497700  | -1.84242400 | H | -2.36536200 | -4.52463200 | 0.32921600  |
| H | 2.39493300  | 1.29951600  | -2.51291300 | H | -0.73215300 | -2.62860200 | -2.37645400 |
| H | 2.83049400  | 3.67744900  | -2.33034700 | H | -1.65395200 | -4.07669100 | -1.98558100 |
| H | 3.29980400  | 3.54741500  | -0.64723100 | C | -2.85120400 | -2.29169100 | -2.16134400 |
| N | 1.13644000  | 1.05280900  | 0.11529200  | H | -4.48498800 | -0.85675800 | 0.72447500  |
| C | 1.56876700  | 3.29806800  | 1.46920400  | H | -3.13827300 | -0.88662100 | 1.84090000  |
| H | 1.39106200  | 4.36952000  | 1.34270000  | H | -2.35310900 | -0.20463300 | -2.30401000 |
| H | 1.16562600  | 3.01764100  | 2.44081600  | H | -4.01003500 | -0.50206800 | -1.80200800 |
| H | 2.64586200  | 3.15932600  | 1.47670700  | H | -4.20105300 | -3.10085500 | 0.06242100  |
| C | 3.72613700  | 0.88499600  | 0.62394500  | H | -3.98433800 | -3.11455100 | 1.78726400  |
| H | 3.64425700  | 0.14697000  | 1.42005900  | H | -3.70823800 | -2.87160500 | -1.80638100 |
| H | 4.66059200  | 0.68015700  | 0.09585300  | H | -2.93544000 | -2.29525000 | -3.25584300 |
| H | 3.82827000  | 1.87654700  | 1.05919100  | O | -0.08174200 | -0.70907900 | -1.12843900 |
| C | -0.67436100 | 2.79276900  | 0.65042400  | C | 0.13169100  | 0.59093900  | -1.08283400 |
| H | -1.32607000 | 2.79640100  | -0.22397400 | H | 0.62409300  | 0.94837800  | -1.98441700 |
| H | -0.76817700 | 1.17024300  | -0.88976300 |   |             |             |             |

## S4 Crystallographic data

### *General Information*

Single crystals with suitable size of all compounds were mounted on CryoLoops with Paratone-N and optically aligned on a Bruker SMART APEX-II X-ray diffractometer with 1K CCD detector using a digital camera. Initial intensity measurements were performed using a fine-focused sealed tube, graphite-monochromated, X-ray source (Mo K $\alpha$ ,  $\lambda = 0.71073 \text{ \AA}$ ) at 50 kV and 30 mA. Standard APEX-II [9] software package was used for determining the unit cells, generating the data collection strategy, and controlling data collection. SAINT [10] was used for data integration including Lorentz and polarization corrections. Semi-empirical absorption corrections were applied using SCALE (SADABS) [11]. The structures of all compounds were solved by direct methods and refined by full-matrix least-squares methods with SHELX-97 [12] in the SHELXTL6.14 package. As the solvent molecules in some compounds are highly disordered, the SQUEEZE subroutine of the PLATON [13] software suit was used to remove the scattering contributions from the highly disordered guest molecules. The resulting new HKL files were used to further refine the structures. All of the H atoms (on C atoms) were generated geometrically and refined in riding mode. Crystallographic information for all obtained phases is summarized in Table S1. Atomic coordinates and additional structural information are provided in the cif files of the Supporting Information.

**Table S1.** Crystal data and structure refinement for **1** and **2**.

|                                   | <b>1</b>                                        | <b>2</b>                                        |
|-----------------------------------|-------------------------------------------------|-------------------------------------------------|
| Empirical formula                 | C <sub>23</sub> H <sub>36</sub> B N             | C <sub>23</sub> H <sub>38</sub> B N O           |
| Formula weight                    | 337.34                                          | 355.35                                          |
| Temperature                       | 150(2) K                                        | 296(2) K                                        |
| Wavelength                        | 0.71073 Å                                       | 0.71073 Å                                       |
| Crystal system                    | Monoclinic                                      | Orthorhombic                                    |
| Space group                       | P2 <sub>1</sub> /c                              | P2 <sub>1</sub> 2 <sub>1</sub> 2 <sub>1</sub>   |
| Unit cell dimensions              | a = 7.6005(6) Å                                 | a = 11.546(4) Å                                 |
|                                   | b = 18.9799(16) Å                               | b = 13.277(5) Å                                 |
|                                   | c = 13.7261(12) Å                               | c = 13.602(5) Å                                 |
|                                   | α = 90°                                         | α = 90°                                         |
|                                   | β = 92.6030(10)°                                | β = 90°                                         |
| Volume                            | 1978.0(3) Å <sup>3</sup>                        | 2085.1(14) Å <sup>3</sup>                       |
|                                   | Z                                               | 4                                               |
| Density (calculated)              | 1.133 Mg/m <sup>3</sup>                         | 1.132 Mg/m <sup>3</sup>                         |
| Absorption coefficient            | 0.063 mm <sup>-1</sup>                          | 0.067 mm <sup>-1</sup>                          |
| F(000)                            | 744                                             | 784                                             |
| Crystal size                      | 0.580 × 0.460 × 0.280 mm <sup>3</sup>           | 0.480 × 0.300 × 0.220 mm <sup>3</sup>           |
| Theta range for data collection   | 1.832 to 28.215°                                | 2.144 to 30.530°                                |
| Index ranges                      | -10 ≤ h ≤ 10, -25 ≤ k ≤ 25, -18 ≤ l ≤ 18        | -14 ≤ h ≤ 16, -16 ≤ k ≤ 18, -19 ≤ l ≤ 19        |
| Reflections collected             | 20848                                           | 16231                                           |
| Independent reflections           | 4871 [R(int) = 0.0300]                          | 6365 [R(int) = 0.0200]                          |
| Completeness (theta = 25.242°)    | 100.0 %                                         | 100.0 %                                         |
| Max. and min. transmission        | 0.982 and 0.965                                 | 0.985 and 0.976                                 |
| Data/restraints/parameters        | 4871/0/230                                      | 6365/0/244                                      |
| Goodness-of-fit on F <sup>2</sup> | 1.043                                           | 1.051                                           |
| Final R indices [I > 2σ(I)]       | R1 = 0.0434, wR2 = 0.1160                       | R1 = 0.0354, wR2 = 0.0891                       |
| R indices (all data)              | R1 = 0.0470, wR2 = 0.1193                       | R1 = 0.0394, wR2 = 0.0919                       |
| Largest diff. peak and hole       | 0.420 and -0.195 e <sup>-</sup> Å <sup>-3</sup> | 0.307 and -0.163 e <sup>-</sup> Å <sup>-3</sup> |

## References

1. Frisch, M.J.; Trucks, G.W.; Schlegel, H.B.; Scuseria, G.E.; Robb, M.A.; Cheeseman, J.R.; Scalmani, G.; Barone, V.; Mennucci, B.; Petersson, G.A.; *et al.* *Gaussian 09*, revision C.01; Gaussian, Inc.: Wallingford, CT, USA, 2009.
2. Chai, J.D.; Head-Gordon, M. Long-range corrected hybrid density functionals with damped atom-atom dispersion corrections. *Phys. Chem. Chem. Phys.* **2008**, *10*, 6615–6620.
3. Goerigk, L.; Grimme, S. A thorough benchmark of density functional methods for general main group thermochemistry, kinetics, and noncovalent interactions. *Phys. Chem. Chem. Phys.* **2011**, *13*, 6670–6688.
4. Chernichenko, K.; Madarász, Á.; Pápai, I.; Nieger, M.; Leskelä, M.; Repo, T. A frustrated-Lewis-pair approach to catalytic reduction of alkynes to *cis*-alkenes. *Nat. Chem.* **2013**, *5*, 718–723.
5. Francl, M.M.; Pietro, W.J.; Hehre, W.J.; Binkley, J.S.; Gordon, M.S.; Defrees, D.J.; Pople, J.A. Self-consistent molecular orbital methods. XXIII. A polarization-type basis set for second-row elements. *J. Chem. Phys.* **1982**, *77*, 3654–3665.
6. Hehre, W.J.; Ditchfield, R.; Pople, J.A. Self-Consistent Molecular Orbital Methods. XII. Further Extensions of Gaussian-Type Basis Sets for Use in Molecular Orbital Studies of Organic Molecules. *J. Chem. Phys.* **1972**, *56*, 2257–2261.
7. Marenich, A.V.; Cramer, C.J.; Truhlar, D.G. Universal solvation model based on solute electron density and on a continuum model of the solvent defined by the bulk dielectric constant and atomic surface tensions. *J. Phys. Chem. B* **2009**, *113*, 6378–6396.
8. Grimme, S. Semiempirical GGA-type density functional constructed with a long-range dispersion correction. *J. Comp. Chem.* **2006**, *27*, 1787–1799.
9. *APEX2*; Bruker AXS Inc.: Madison, WI, USA, 2007.
10. *SAINT*; Bruker AXS Inc.: Madison, WI, USA, 2007.
11. Sheldrick, G.M. *SADABS*; Bruker AXS Inc.: Madison, WI, USA, 2007.
12. Sheldrick, G.M. A short history of SHELX. *Acta Crystallogr.* **2008**, *A64*, 112–122.
13. Spek, A.L. Structure validation in chemical crystallography. *Acta Crystallogr.* **2009**, *D65*, 148–155.
